# Supplementary material for: Extending molecular dynamics with dipolar NMR tensors as constraints to chiral phosphorus compounds
Source: Royal Society of Chemistry journal article supplement (doi:10.1039/d4cp02401j), 2024-01-01
Supplement: d4cp02401j1.pdf [file d4cp02401j1.pdf]

## SUPPORTING INFORMATION

### Extending Molecular Dynamics with Dipolar NMR Tensors as Constraints to Chiral Phosphorus Compounds

Ulrich Sternberg,<sup>a,b</sup> Markéta Christou Tichotová,<sup>c,d</sup> Lucie Tučková,<sup>c</sup> Aneta Ešnerová,<sup>e</sup> Jan Hanus,<sup>c</sup>  
Ondřej Baszczyński,<sup>c,e</sup> and Eliška Procházková<sup>c,\*</sup>

[prochazkova@uochb.cas.cz](mailto:prochazkova@uochb.cas.cz)

<sup>a</sup> COSMOS-Software, Johann-Griesbach-Str. 26, 07743 Jena, Germany

<sup>b</sup> Karlsruhe Institute of Technology (KIT), Postfach 3640, D-76021 Karlsruhe, Germany

<sup>c</sup> Institute of Organic Chemistry and Biochemistry, Czech Academy of Sciences, 160 00 Prague, Czech Republic

<sup>d</sup> Department of Physical and Macromolecular Chemistry, Faculty of Science, Charles University, 116 28 Prague, Czech Republic

<sup>e</sup> Department of Organic Chemistry, Faculty of Science, Charles University, 116 28 Prague, Czech Republic

## Table of Contents

|      |                                                           |     |
|------|-----------------------------------------------------------|-----|
| 1.   | Experimental Section.....                                 | S3  |
| 1.1. | Instrumentation.....                                      | S3  |
| 1.2. | Synthesis and diastereomer separation of 3.....           | S3  |
| 1.3. | NMR and HR-MS spectra of 3.....                           | S5  |
| 1.4. | Composition of the samples prepared for RDC analysis..... | S9  |
| 1.5. | Low-energy study of compound 3.....                       | S9  |
| 2.   | MDOC Simulations.....                                     | S17 |
| 2.1. | Parametrization of MDOC.....                              | S17 |
| 2.2. | Results of the compounds 1-SR and 1-RR.....               | S18 |
| 2.3. | Results of the compounds 2-RR and 2-RS.....               | S20 |
| 2.4. | Results of compounds 3-RR and 3-SR.....                   | S22 |
| 3.   | XYZ coordinates of low energy structures of 3.....        | S27 |
| 4.   | References.....                                           | S41 |

## 1. Experimental Section

### 1.1. Instrumentation

For structural assignment, NMR spectra were recorded on a Bruker Avance III HD 500 spectrometer with a broad-band cryo-probe, with an ATM module (5 mm CPBBO BB- $^1\text{H}/^{19}\text{F}/^{15}\text{N}/\text{D}$  Z-GRD), operating at 499.98 MHz for  $^1\text{H}$ , at 125.73 MHz for  $^{13}\text{C}$  and at 202.39 MHz for  $^{31}\text{P}$ .

For RDC analysis, NMR spectra were recorded on a Bruker Avance III HD 600 spectrometer with an inverse triple resonance cryo-probe, with an ATM module (5 mm CPTCI  $^1\text{H}/^{13}\text{C}/^{15}\text{N}/\text{D}$  Z-GRD), operating at 600.13 MHz for  $^1\text{H}$  and at 150.92 MHz for  $^{13}\text{C}$ .

HR-MS spectra were recorded on an LTQ Orbitrap XL (Thermo Fisher Scientific) using atmospheric-pressure chemical ionization (APCI).

### 1.2. Synthesis and diastereomer separation of **3**

Starting compounds and solvents were purchased from Sigma Aldrich (EU) and directly used for synthesis. Gradient Flash chromatography was performed on Compact preparative system ECOM (CZ) using manually pre-filled silica (Silica gel 60, 0.040-0.063 mm, Merck) cartridges.

#### Ethyl ((1*R*,2*S*,5*R*)-2-isopropyl-5-methylcyclohexyl) (*R*)-phenylphosphonate and ethyl ((1*R*,2*S*,5*R*)-2-isopropyl-5-methylcyclohexyl) (*S*)-phenylphosphonate

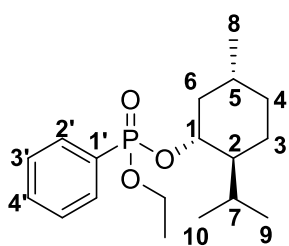

Ethyl phenylphosphinate (94%, 620  $\mu\text{L}$ , 5.2 mmol) was added to a mixture of L-menthol (630 mg, 4 mmol) and *N*-methylimidazole (500 mg, 6 mmol) in tetrachloromethane (10 mL). The reaction was stirred overnight and quenched by adding water (20 mL). The water phase was extracted with dichloromethane (3 x 15 mL), dried with magnesium sulfate, and evaporated. Gradient Flash chromatography on silica (Hexane/EtOAc, 0–100%) afforded the title products, 743 mg (44 %), a colorless solid.

The diastereomers of **3** (3A and 3B) were separated by semi-preparative HPLC with a chiral phase column under the following conditions: ChiralArt Cellulose-SB (250 x 20 mm, 5  $\mu\text{m}$ , YMC), heptane, 0.1% IPA @20 mL/min,  $t_{\text{R}1}$  = 16:40 min,  $t_{\text{R}2}$  = 19.52 min. The HPLC instrument used to separate the diastereomers was a Puriflash PF5.250 chromatograph (Interchim) equipped with a diode array detector. The reproducibility of the separation was very limited.

**3A dataset:**

**<sup>1</sup>H NMR** (500 MHz, CDCl<sub>3</sub>, 25°C): δ = 7.81 (m, 2H, 2'), 7.53 (m, 1H, 4'), 7.45 (m, 2H, 3'), 4.21 (m, 1H, 1), 4.12 (m, 1H, -O-CH<sub>2</sub>-CH<sub>3</sub>), 4.04 (m, 1H, -O-CH<sub>2</sub>-CH<sub>3</sub>), 2.33 (dm, *J*<sub>Gem</sub> = 12.0, 6a), 1.87 (m, 1H, 7), 1.67–1.58 (m, 2H, 3a, 4a), 1.52–1.41 (m, 1H, 5), 1.36–1.28 (m, 4H, -O-CH<sub>2</sub>-CH<sub>3</sub>, 2), 1.22 (dm, 1H, *J*<sub>Gem</sub> = 12.0, 6b), 0.99–0.90 (m, 4H, 3b, 5-CH<sub>3</sub>), 0.86 (dm, 1H, *J*<sub>Gem</sub> = 12.8, 4b), 0.79 (d, 3H, *J*<sub>10-7</sub> = 7.1, 10), 0.47 (m, 3H, *J*<sub>9-7</sub> = 6.9, 9) ppm.

**<sup>13</sup>C NMR** (125 MHz, CDCl<sub>3</sub>, 25°C): δ = 132.25 (d, *J*<sub>4'-P</sub> = 3.1, 4'), 131.91 (d, *J*<sub>2'-P</sub> = 9.9, 2'), 129.16 (d, *J*<sub>1'-P</sub> = 188.4, 1'), 128.45 (d, *J*<sub>3'-P</sub> = 15.4, 3'), 77.85 (d, *J*<sub>1-P</sub> = 6.5, 1), 61.97 (d, *J*<sub>CH<sub>2</sub>-P</sub> = 5.4, -O-CH<sub>2</sub>-CH<sub>3</sub>), 48.66 (d, *J*<sub>2-P</sub> = 6.9, 2), 43.51 (6), 34.24 (4), 31.72 (5), 25.63 (7), 22.88 (3), 22.16 (8), 21.06 (10), 16.46 (d, *J*<sub>CH<sub>3</sub>-P</sub> = 6.7, -O-CH<sub>2</sub>-CH<sub>3</sub>), 15.36 (9) ppm.

**<sup>31</sup>P NMR** (202 MHz, CDCl<sub>3</sub>, 25°C): δ = 17.98 ppm.

**HR-MS** (APCI) calculated for C<sub>18</sub>H<sub>30</sub>O<sub>3</sub>P, [M+H]<sup>+</sup> *m/z*: 325.19271, found [M+H]<sup>+</sup> 325.19282.

**3B dataset:**

**<sup>1</sup>H NMR** (500 MHz, CDCl<sub>3</sub>, 25°C): δ = 7.81 (m, 2H, 2'), 7.53 (m, 1H, 4'), 7.45 (m, 2H, 3'), 4.34 (m, 1H, 1), 4.12 (m, 1H, -O-CH<sub>2</sub>-CH<sub>3</sub>), 4.03 (m, 1H, -O-CH<sub>2</sub>-CH<sub>3</sub>), 2.23 (m, 1H, 7), 2.09 (dm, 1H, *J*<sub>Gem</sub> = 12.2, 6a), 1.70–1.59 (m, 2H, 3a, 4a), 1.46–1.34 (m, 2H, 5, 2), 1.29 (t, 3H, *J*<sub>CH<sub>3</sub>-CH<sub>2</sub></sub> = 7.1, -O-CH<sub>2</sub>-CH<sub>3</sub>), 1.09 (dm, 1H, *J*<sub>Gem</sub> = 12.2, 6b), 1.02 (m, 1H, 3b), 0.93 (d, 3H, *J*<sub>10-7</sub> = 7.1, 10), 0.86–0.80 (m, 7H, 4b, 11, 8) ppm.

**<sup>13</sup>C NMR** (125 MHz, CDCl<sub>3</sub>, 25°C): δ = 132.25 (d, *J*<sub>4'-P</sub> = 3.1, 4'), 131.80 (d, *J*<sub>2'-P</sub> = 9.4, 2'), 129.92 (d, *J*<sub>1'-P</sub> = 189.4, 1'), 128.48 (d, *J*<sub>3'-P</sub> = 15.0, 3'), 78.13 (d, *J*<sub>1-P</sub> = 7.0, 1), 62.09 (d, *J*<sub>CH<sub>2</sub>-P</sub> = 5.2, -O-CH<sub>2</sub>-CH<sub>3</sub>), 48.75 (d, *J*<sub>2-P</sub> = 6.2, 2), 43.18 (6), 34.21 (4), 31.66 (5), 25.72 (7), 22.97 (3), 22.05 (8), 21.18 (10), 16.46 (d, *J*<sub>CH<sub>3</sub>-P</sub> = 6.9, -O-CH<sub>2</sub>-CH<sub>3</sub>), 15.79 (9) ppm.

**<sup>31</sup>P NMR** (202 MHz, CDCl<sub>3</sub>, 25°C): δ = 17.37 ppm.

**HR-MS** (APCI) calculated for C<sub>18</sub>H<sub>30</sub>O<sub>3</sub>P, [M+H]<sup>+</sup> *m/z*: 325.19271, found [M+H]<sup>+</sup> 325.19278.

### 1.3. NMR and HR-MS spectra of 3

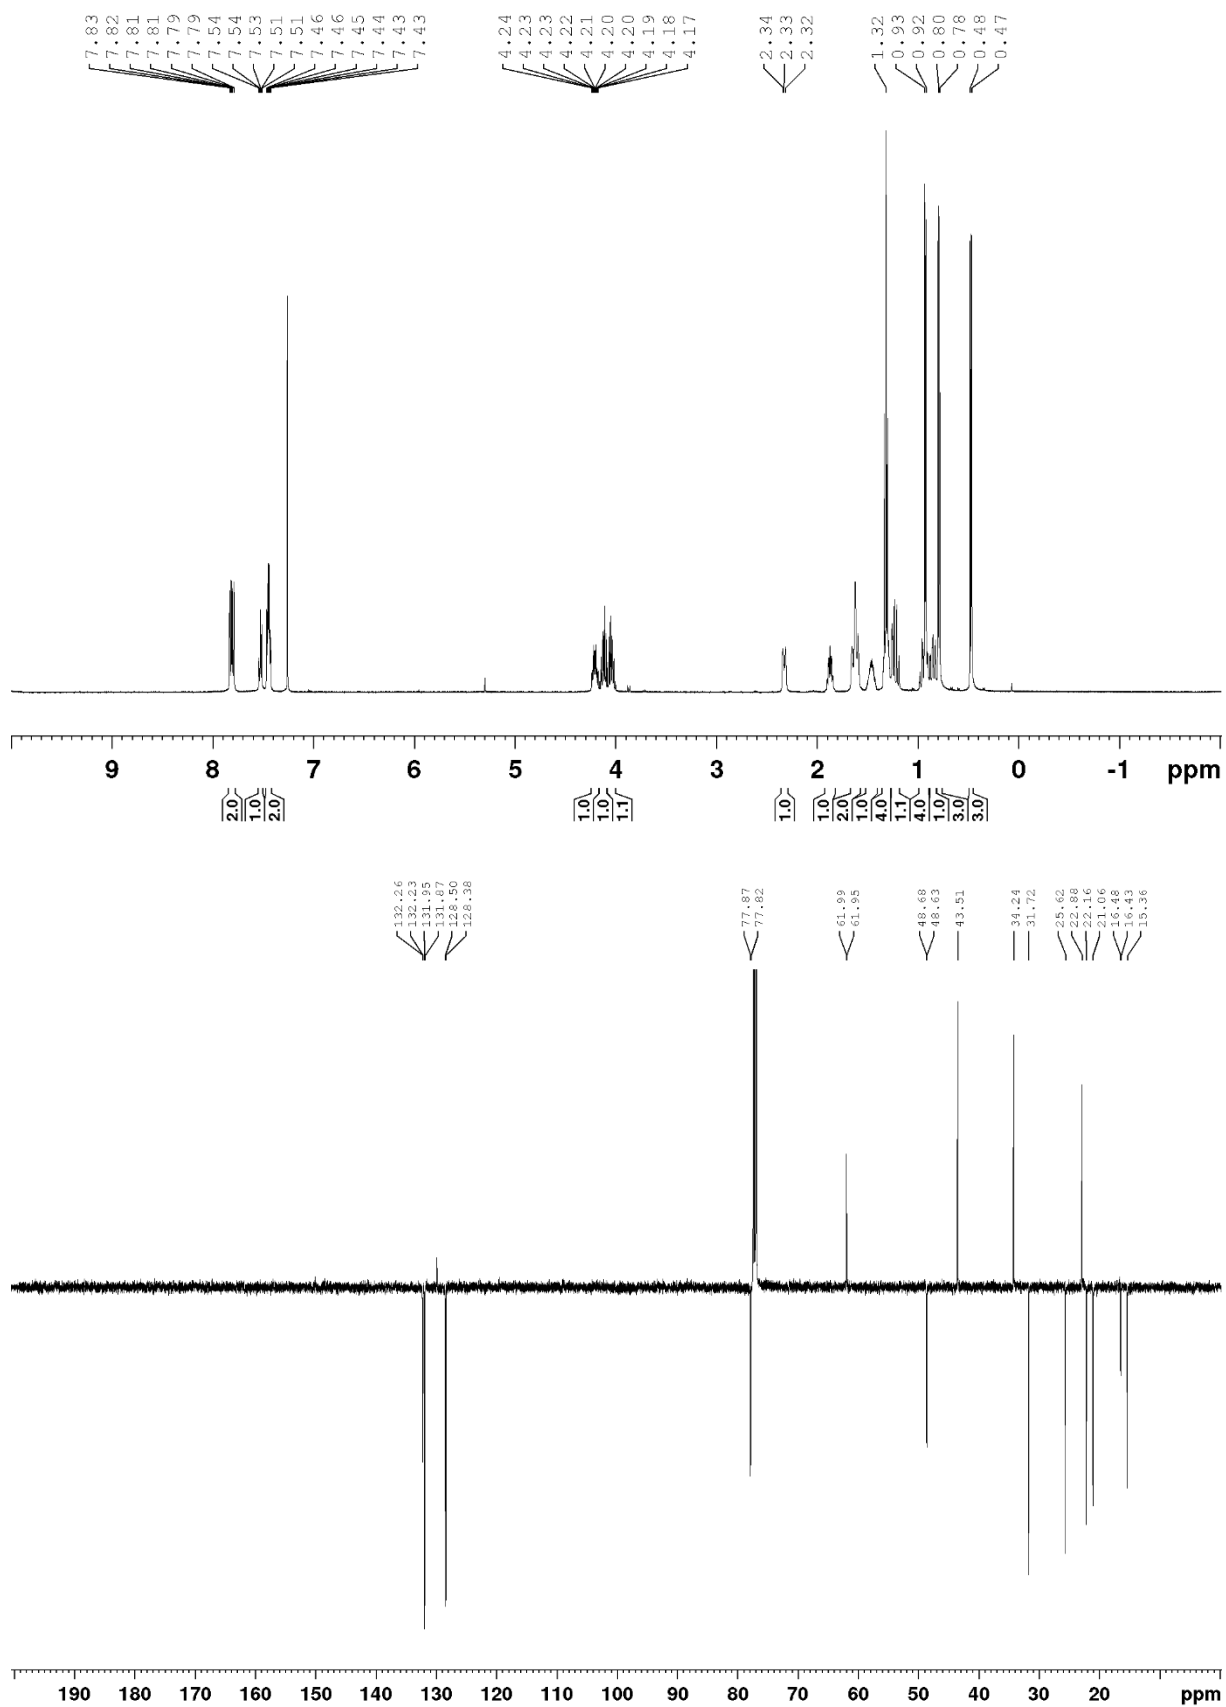

Figure S1:  $^1\text{H}$  (top) and  $^{13}\text{C}$  APT (bottom) NMR spectra of 3A in  $\text{CDCl}_3$  measured at room temperature

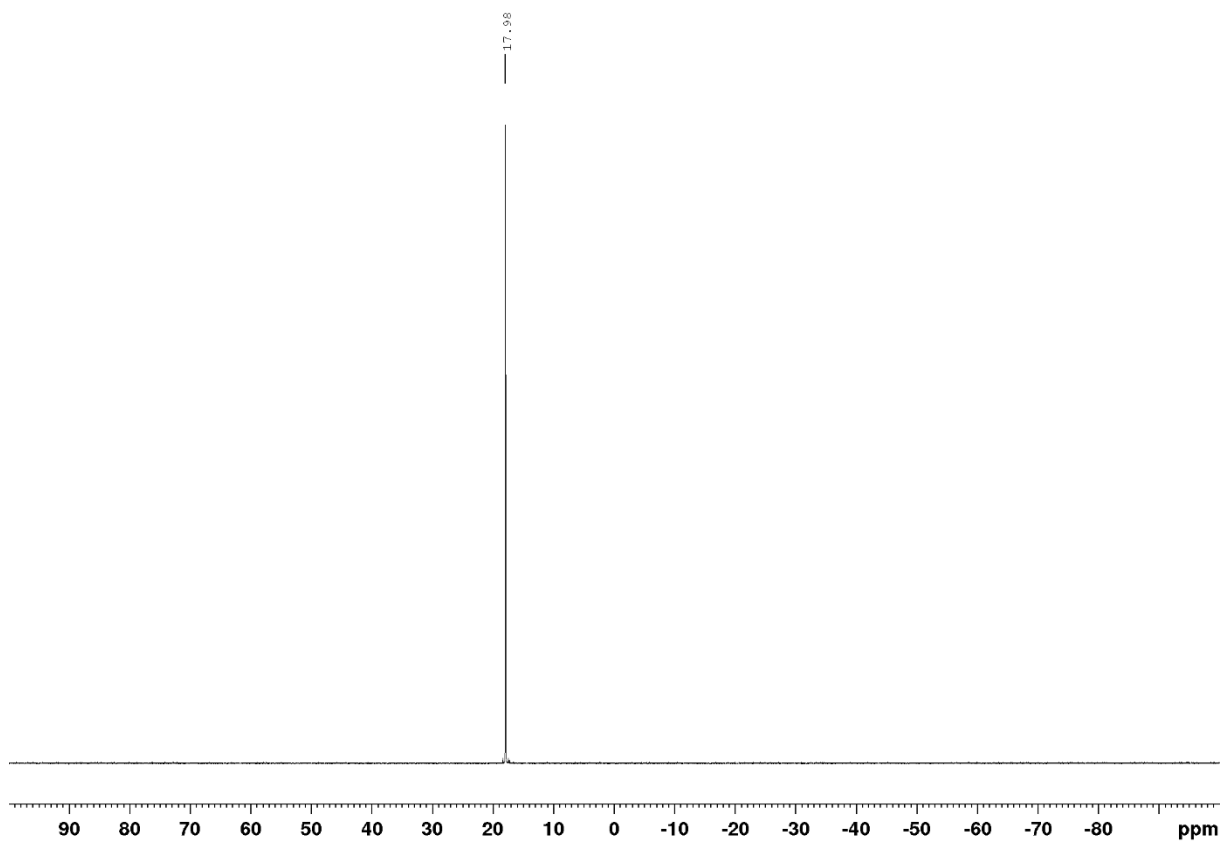

**Figure S2:**  $^{31}\text{P}$  NMR spectrum of **3A** in  $\text{CDCl}_3$  measured at room temperature

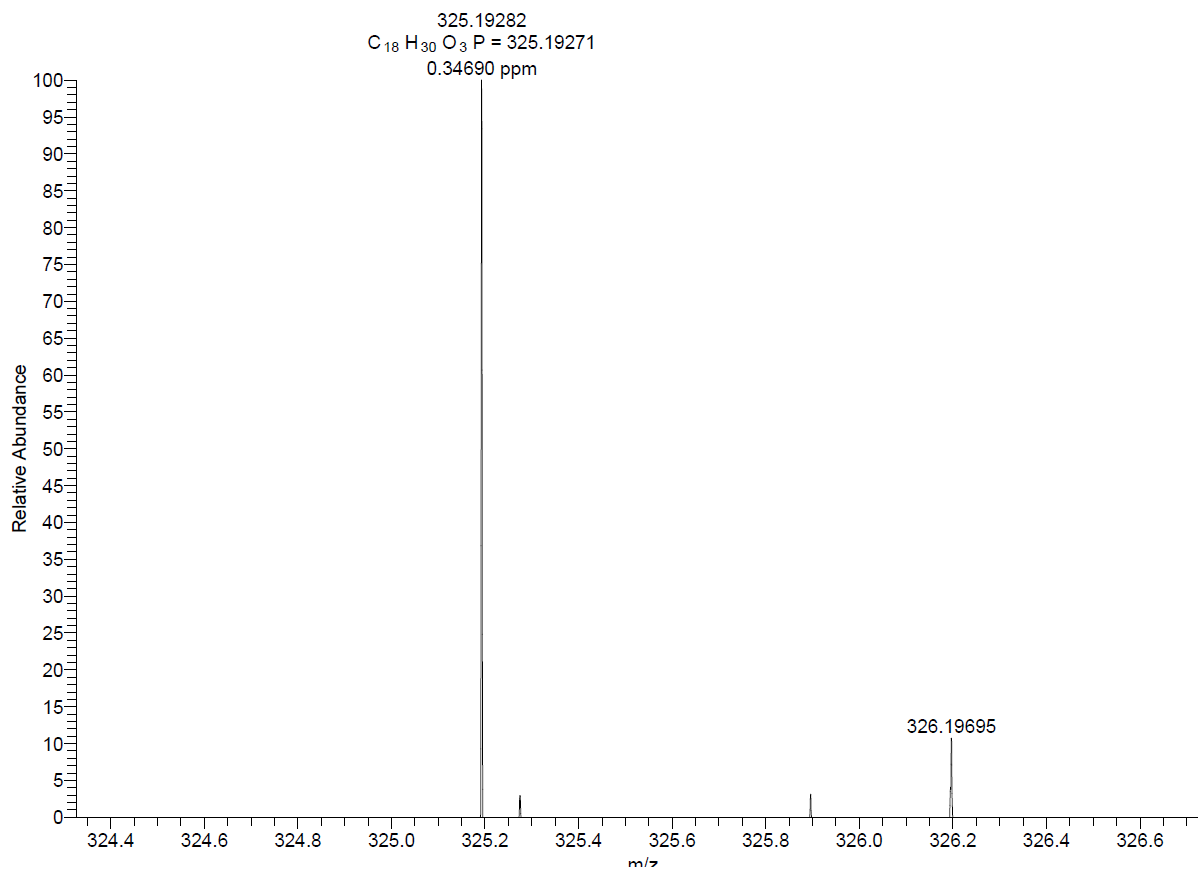

**Figure S3:** HR-MS spectrum of **3A**

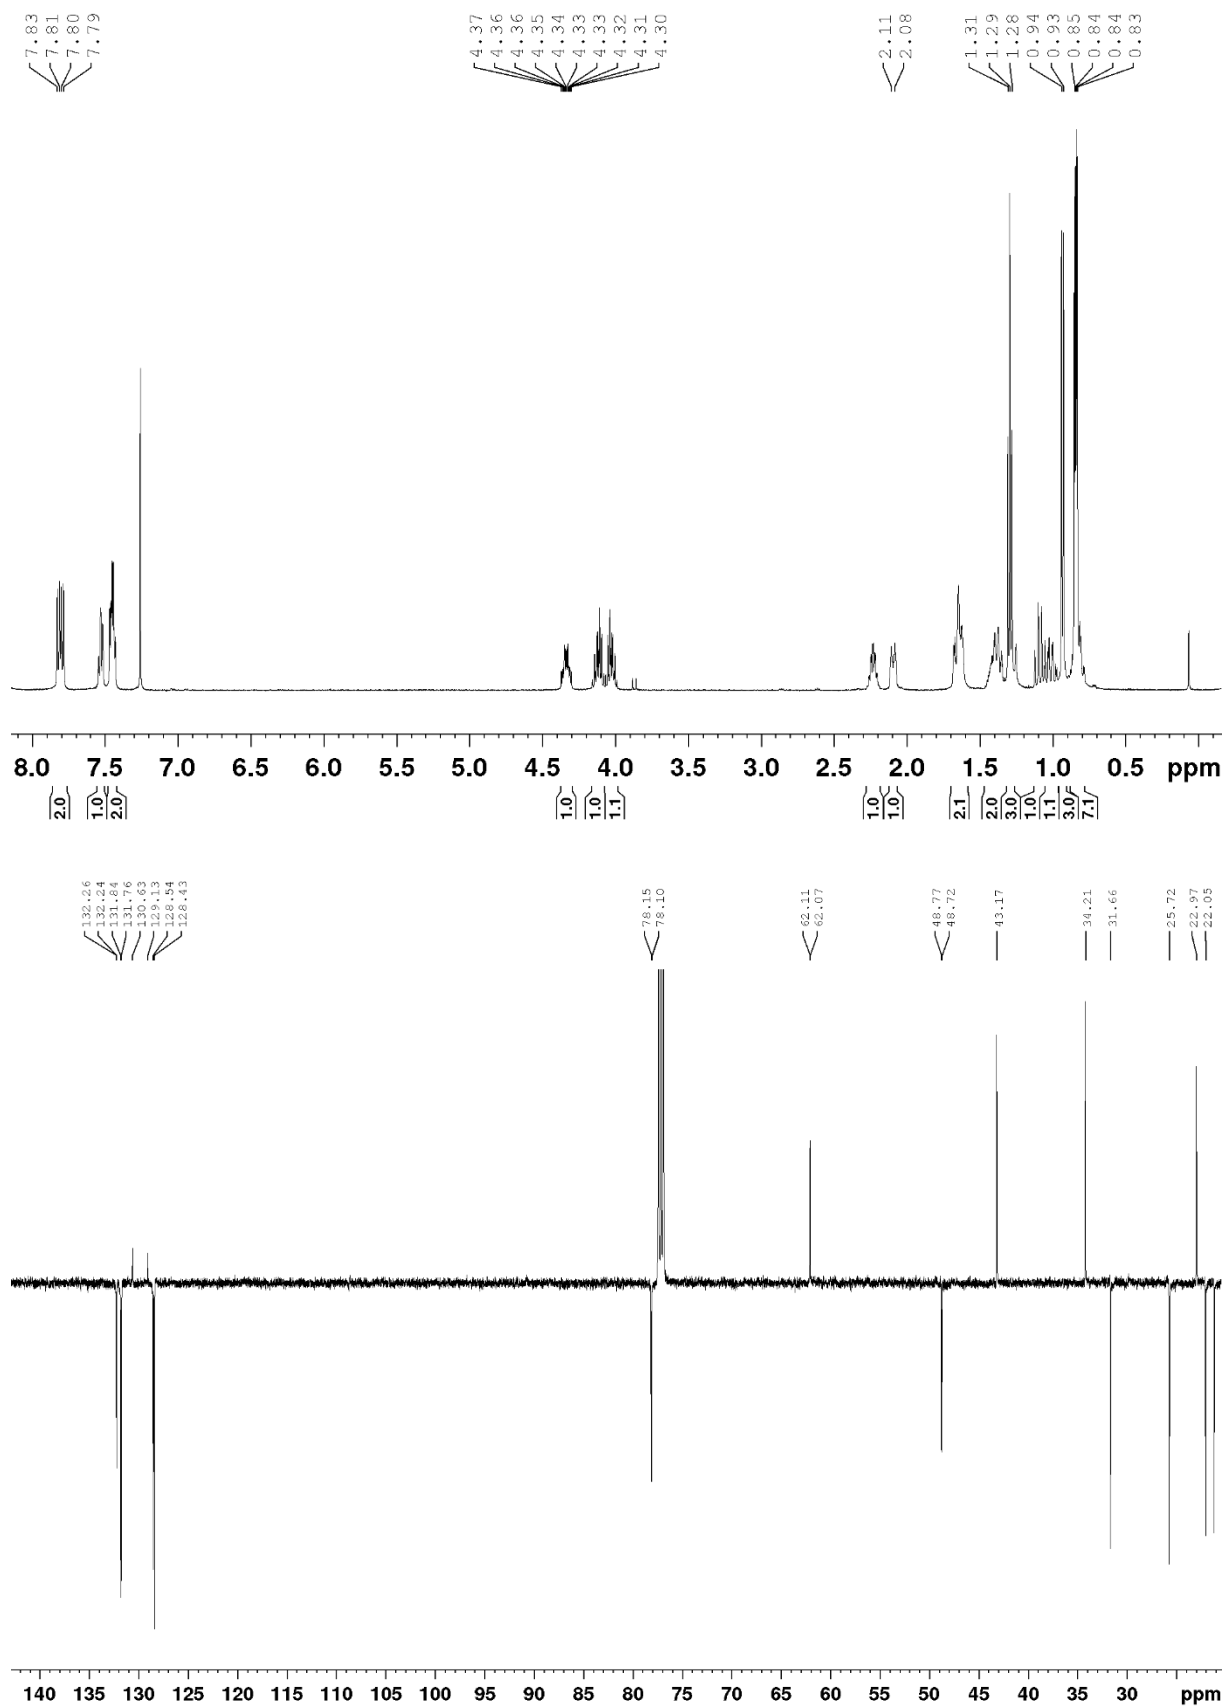

**Figure S4:** <sup>1</sup>H (top) and <sup>13</sup>C APT (bottom) NMR spectra of **3B** in CDCl<sub>3</sub> measured at room temperature

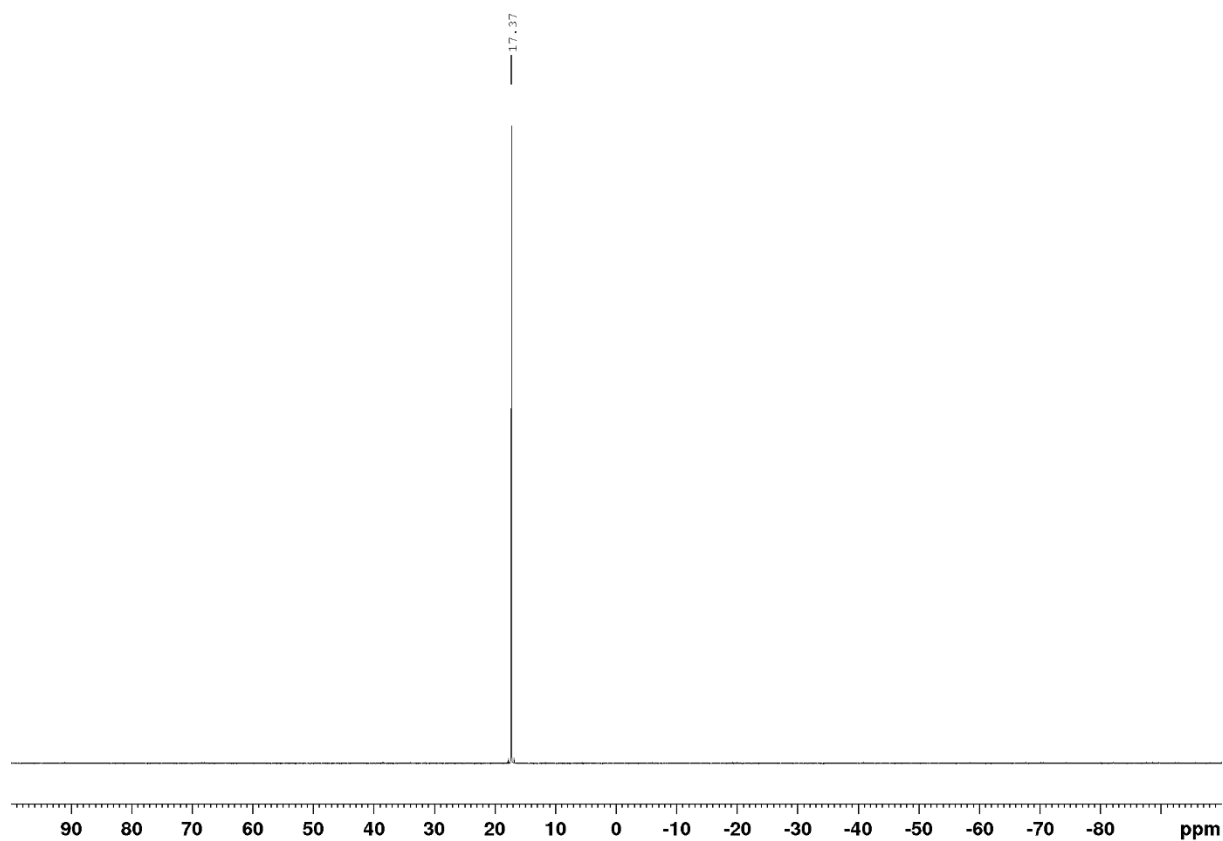

**Figure S5:**  $^{31}\text{P}$  NMR spectrum of **3B** in  $\text{CDCl}_3$  measured at room temperature

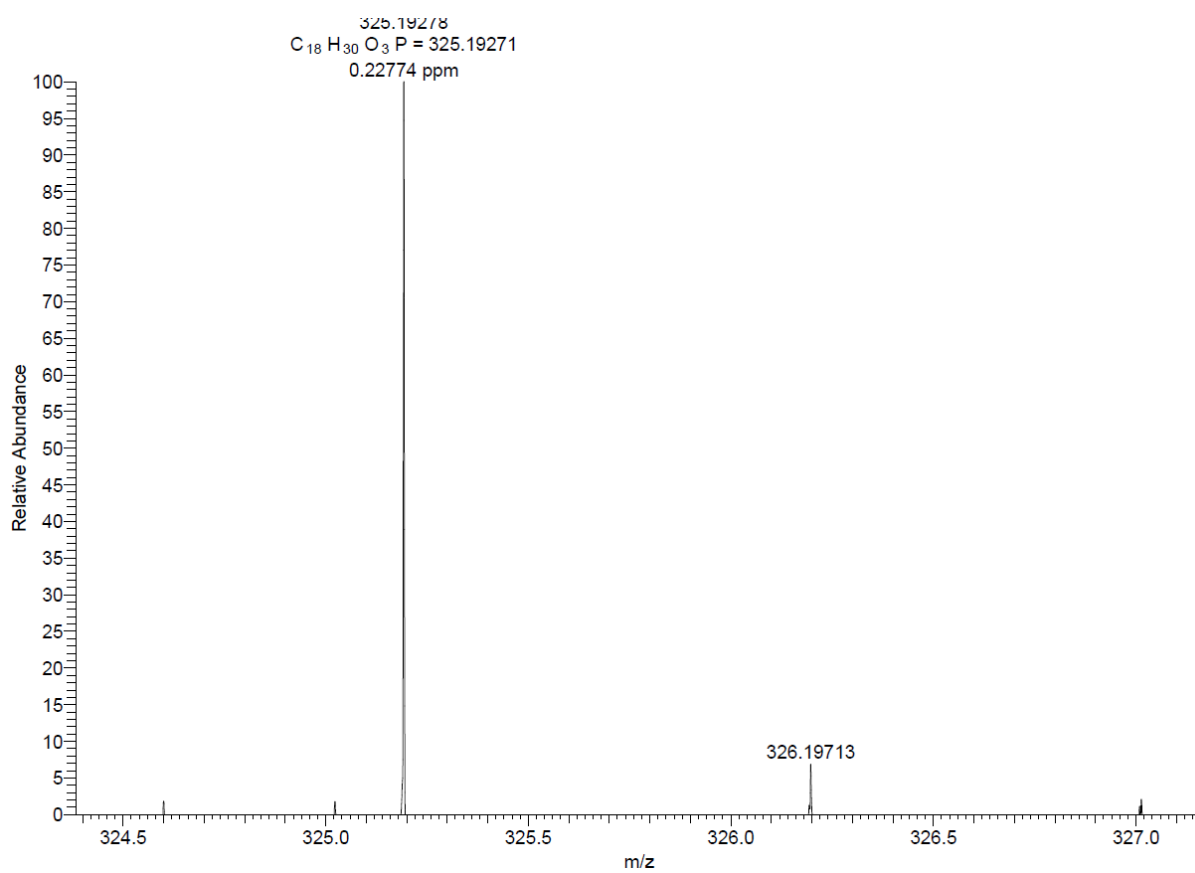

**Figure S6:** HR-MS spectrum of **3B**



#### 1.4. Composition of the samples prepared for RDC analysis

**Table S1:** Composition of individual samples prepared for RDC measurements

| Compound  | m (compound)<br>[mg] | m (CDCl <sub>3</sub> )<br>[mg] | m (PBLG)<br>[mg] | w (medium)<br>[%] |
|-----------|----------------------|--------------------------------|------------------|-------------------|
| <b>3A</b> | 4.9                  | 900.0                          | 68.3             | 7.0               |
| <b>3B</b> | 5.2                  | 900.0                          | 73.0             | 7.5               |

Sample preparation, RDC analysis and Boltzmann distribution were conducted as described in our previous studies.<sup>1,2</sup> Poly- $\gamma$ -benzyl-L-glutamate (PBLG) was used as an alignment medium.

#### 1.5. Low-energy study of compound 3

##### *Conformational sampling*

Conformational sampling was performed using MacroModel v13.1 (Schrödinger 2022-1 suite)<sup>3,4</sup> with the following set of parameters: OPLS4 force field,<sup>5</sup> chloroform solvent, mixed torsional/low-mode sampling method with a maximum of 1000 steps, 40 kJ/mol energy window for saving structures, and 0.75 Å maximum atom deviation cut-off.

##### *Density functional theory (DFT) calculations*

DFT calculations were performed using the Gaussian 16 program package.<sup>6</sup> Geometry optimizations of the conformers derived from conformational sampling were performed *in vacuo* using the B3LYP functional<sup>7-10</sup> with empirical dispersion correction (GD3)<sup>11</sup> and the 6-31+G(d,p) basis set.<sup>12</sup>

##### *Machine learning-aided elimination of redundant structures*

Unique conformers were identified using the machine learning (ML)-based mean-shift algorithm<sup>13</sup> as implemented in the Scikit-learn Python package (scikit-learn.org). During the ML-aided elimination procedure, the conformers were sorted into clusters based on dihedral angles. Each cluster contained all conformers with similar dihedral angles. The cluster size was specified by the mean shift clustering algorithm using a bandwidth parameter. The value of this parameter determines whether each data point belongs to a given cluster, i.e., whether a given set of conformers is similar enough. This parameter is approximately proportional to the size of a given cluster. The optimal value of isomers of

3 was 20. For each cluster, only the lowest energy conformer was selected as the unique non-redundant conformer.

#### *Calculations of conformer populations*

The relative populations of conformers were calculated using Boltzmann distribution according to equation S1:

$$p_i = \frac{e^{\frac{E_0 - E_i}{RT}}}{\sum_i e^{\frac{-E_i}{RT}}} \quad (S1)$$

Where  $p_i$  is the relative population of conformer  $i$ ,  $E_0$  is the energy of the global minimum,  $E_i$  is the energy of conformer  $i$ ,  $R$  is the universal gas constant, and  $T$  is the thermodynamic temperature. The temperature 298.15 K (25 °C) was considered thoroughly. Of all the nonredundant conformers, only the conformers populated by more than 2% were used in further calculations of RDC parameters.

#### *P3D/PALES*

We performed molecular alignment simulations using P3D<sup>14</sup> as implemented in PALES<sup>15</sup> software and as recommended by the authors.<sup>16</sup> The following command was used to run the simulation:

```
pales -elPales -3D -pot3D PBLG.dx -lcS 0.8 -maxPot 2 -z1 150 -zN 250 -nX 129 -nY 129 -nZ 385 -dX 0.4 -dY 0.4 -dZ 0.4 -H -nosurf -pdb Molecule.pdb -inD RDCs.tbl -wv 0.12 -rM 8 -pka charges.pka -outD output.out,
```

where PBLG.dx is the potential file of PBLG, Molecule.pdb is the PDB file of the studied molecule, RDCs.tbl is the list of experimental RDCs, charges.pka is the list of atomic charges obtained from AtomicChargeCalculator II,<sup>17</sup> and output.out is the final output file. Atomic charges were calculated using the electronegativity equalization method (EEM)<sup>18</sup> based on the atoms in molecules (AIM) calculation scheme at the B3LYP/6-311G level of theory.<sup>19</sup>

#### *Calculation of nConf20*

We calculated the values of the flexibility descriptor nConf<sub>20</sub> using the code, as provided in the original article by Wicker and Cooper.<sup>20</sup> Because a more detailed scale was needed for these compounds, we set the atom root-mean-square (RMS) distance threshold to 0.5 Å to remove duplicate conformers. The number of generated conformers was set to 10,000 to alleviate stochasticity effects on the structure generation process.

**Table S2:** Theoretical (calculated) RDCs of the low-energy conformers of **3-RR** normalized against the 3A experimental dataset

| Atoms                                | Experimental RDCs [Hz] | Theoretical Normalized RDCs [Hz] |        |        |        |        |        |        |        |
|--------------------------------------|------------------------|----------------------------------|--------|--------|--------|--------|--------|--------|--------|
|                                      |                        | Conformer                        |        |        |        |        |        |        |        |
|                                      |                        | A                                | B      | C      | D      | E      | F      | G      | H      |
| <b>C4'-H4'</b>                       | 1.76                   | -13.24                           | -11.42 | -10.00 | -14.72 | -18.97 | -22.88 | -14.33 | -6.27  |
| <b>C1-H1</b>                         | 24.13                  | 23.93                            | 23.64  | 20.78  | 24.93  | 22.76  | 23.00  | 24.04  | 23.37  |
| <b>C2-H2</b>                         | 25.48                  | 23.95                            | 23.64  | 20.56  | 23.18  | 22.52  | 22.70  | 22.64  | 22.45  |
| <b>C5-H5</b>                         | 25.63                  | 23.99                            | 23.65  | 20.16  | 23.22  | 22.25  | 22.32  | 22.62  | 23.32  |
| <b>C7-H7</b>                         | -5.17                  | -4.19                            | -5.25  | -20.53 | -4.30  | -6.39  | -3.86  | -5.81  | -10.18 |
| <b>CH<sub>2</sub>-CH<sub>3</sub></b> | -0.09                  | 1.61                             | -0.71  | -2.14  | 0.73   | -2.52  | -2.49  | -2.96  | -0.84  |
| <b>C5-C8</b>                         | -0.58                  | -0.59                            | -0.65  | 0.05   | -0.04  | -0.22  | -0.30  | 0.14   | -1.01  |
| <b>C4'-P</b>                         | -0.01                  | -0.07                            | -0.06  | -0.05  | -0.08  | -0.10  | -0.12  | -0.07  | -0.03  |
| <b>C1'-P</b>                         | 0.21                   | -1.17                            | -1.00  | -0.77  | -1.20  | -1.66  | -2.05  | -1.12  | -0.51  |
| <b>C1-P</b>                          | 0.55                   | -0.35                            | -0.36  | -0.58  | -0.74  | -0.55  | -0.48  | -0.73  | -0.39  |
| <b>C2-P</b>                          | -0.21                  | -0.13                            | -0.12  | -0.14  | -0.14  | -0.10  | -0.07  | -0.14  | -0.09  |
| <i>R</i>                             |                        | 0.935                            | 0.953  | 0.919  | 0.924  | 0.896  | 0.857  | 0.932  | 0.979  |
| <i>Q</i>                             |                        | 0.677                            | 0.690  | 0.645  | 0.443  | 0.574  | 0.592  | 0.475  | 0.604  |

**Table S3:** Theoretical (calculated) RDCs of the low-energy conformers of **3-RR** normalized against 3B experimental dataset

| Atoms                                | Experimental RDCs [Hz] | Theoretical Normalized RDCs [Hz] |        |        |        |        |        |        |        |
|--------------------------------------|------------------------|----------------------------------|--------|--------|--------|--------|--------|--------|--------|
|                                      |                        | Conformer                        |        |        |        |        |        |        |        |
|                                      |                        | A                                | B      | C      | D      | E      | F      | G      | H      |
| <b>C4'-H4'</b>                       | 6.80                   | -16.54                           | -14.13 | -11.87 | -18.29 | -23.65 | -28.88 | -17.68 | -7.62  |
| <b>C1-H1</b>                         | 29.63                  | 29.88                            | 29.25  | 24.67  | 30.98  | 28.39  | 29.04  | 29.66  | 28.39  |
| <b>C2-H2</b>                         | 30.36                  | 29.91                            | 29.25  | 24.41  | 28.80  | 28.08  | 28.66  | 27.93  | 27.27  |
| <b>C5-H5</b>                         | 30.49                  | 29.97                            | 29.26  | 23.94  | 28.85  | 27.75  | 28.18  | 27.91  | 28.33  |
| <b>C7-H7</b>                         | -7.72                  | -5.23                            | -6.49  | -24.38 | -5.35  | -7.97  | -4.88  | -7.17  | -12.37 |
| <b>CH<sub>2</sub>-CH<sub>3</sub></b> | -0.24                  | 2.02                             | -0.88  | -2.54  | 0.90   | -3.15  | -3.14  | -3.66  | -1.03  |
| <b>C4'-P</b>                         | -0.07                  | -0.09                            | -0.08  | -0.06  | -0.09  | -0.13  | -0.16  | -0.09  | -0.04  |
| <b>C1'-P</b>                         | 0.76                   | -1.47                            | -1.24  | -0.92  | -1.50  | -2.07  | -2.59  | -1.38  | -0.62  |
| <b>C1-P</b>                          | 0.72                   | -0.44                            | -0.44  | -0.69  | -0.92  | -0.69  | -0.61  | -0.90  | -0.47  |
| <b>C2-P</b>                          | -0.25                  | -0.16                            | -0.14  | -0.16  | -0.17  | -0.12  | -0.09  | -0.18  | -0.11  |
| <i>R</i>                             |                        | 0.893                            | 0.917  | 0.913  | 0.882  | 0.851  | 0.803  | 0.895  | 0.961  |
| <i>Q</i>                             |                        | 0.687                            | 0.701  | 0.655  | 0.445  | 0.588  | 0.608  | 0.479  | 0.604  |

**Table S4:** Boltzmann distribution-weight averaged RDCs of **3-RR** conformers normalized against the 3A experimental dataset

| Atoms                                | Experimental RDCs [Hz] | Normalized Boltzmann averaged RDCs [Hz] |
|--------------------------------------|------------------------|-----------------------------------------|
| <b>C4'-H4'</b>                       | 1.76                   | -11.30                                  |
| <b>C1-H1</b>                         | 24.13                  | 20.90                                   |
| <b>C2-H2</b>                         | 25.48                  | 20.74                                   |
| <b>C5-H5</b>                         | 25.63                  | 20.69                                   |
| <b>C7-H7</b>                         | -5.17                  | -7.08                                   |
| <b>CH<sub>2</sub>-CH<sub>3</sub></b> | -0.09                  | -0.22                                   |
| <b>C5-C8</b>                         | -0.58                  | -0.39                                   |
| <b>C4'-P</b>                         | -0.01                  | -0.06                                   |
| <b>C1'-P</b>                         | 0.21                   | -0.97                                   |
| <b>C1-P</b>                          | 0.55                   | -0.39                                   |
| <b>C2-P</b>                          | -0.21                  | -0.11                                   |
| <b><i>R</i></b>                      |                        | 0.946                                   |

**Table S5:** Boltzmann distribution-weight averaged RDCs of conformers of **3-RR** normalized against the 3B experimental dataset

| Atoms                                | Experimental RDCs [Hz] | Normalized Boltzmann averaged RDCs [Hz] |
|--------------------------------------|------------------------|-----------------------------------------|
| <b>C4'-H4'</b>                       | 6.80                   | -13.96                                  |
| <b>C1-H1</b>                         | 29.63                  | 25.80                                   |
| <b>C2-H2</b>                         | 30.36                  | 25.59                                   |
| <b>C5-H5</b>                         | 30.49                  | 25.53                                   |
| <b>C7-H7</b>                         | -7.72                  | -8.60                                   |
| <b>CH<sub>2</sub>-CH<sub>3</sub></b> | -0.24                  | -0.25                                   |
| <b>C4'-P</b>                         | -0.07                  | -0.07                                   |
| <b>C1'-P</b>                         | 0.76                   | -1.20                                   |
| <b>C1-P</b>                          | 0.72                   | -0.48                                   |
| <b>C2-P</b>                          | -0.25                  | -0.14                                   |
| <b><i>R</i></b>                      |                        | 0.912                                   |

**Table S6:** Theoretical (calculated) RDCs of the low-energy **3-SR** conformers normalized against the 3A experimental dataset

| Atoms                                | Experimental RDCs [Hz] | Theoretical Normalized RDCs [Hz] |        |        |        |        |        |
|--------------------------------------|------------------------|----------------------------------|--------|--------|--------|--------|--------|
|                                      |                        | Conformer                        |        |        |        |        |        |
|                                      |                        | A                                | B      | C      | D      | E      | F      |
| <b>C4'-H4'</b>                       | 1.76                   | -9.90                            | -11.12 | -17.91 | -19.13 | -15.38 | -14.09 |
| <b>C1-H1</b>                         | 24.13                  | 22.68                            | 20.88  | 24.12  | 24.09  | 21.72  | 22.38  |
| <b>C2-H2</b>                         | 25.48                  | 22.42                            | 20.60  | 24.31  | 23.46  | 21.67  | 21.50  |
| <b>C5-H5</b>                         | 25.63                  | 23.62                            | 20.39  | 25.75  | 23.28  | 21.36  | 22.10  |
| <b>C7-H7</b>                         | -5.17                  | -9.40                            | -19.37 | 2.55   | -2.32  | -13.68 | -11.60 |
| <b>CH<sub>2</sub>-CH<sub>3</sub></b> | -0.09                  | 0.08                             | -1.88  | 2.38   | -0.23  | -0.03  | -1.07  |
| <b>C5-C8</b>                         | -0.58                  | -1.48                            | -0.09  | -2.16  | -0.50  | -0.48  | -0.99  |
| <b>C4'-P</b>                         | -0.01                  | -0.06                            | -0.06  | -0.10  | -0.10  | -0.08  | -0.08  |
| <b>C1'-P</b>                         | 0.21                   | -1.01                            | -0.87  | -1.94  | -1.64  | -1.23  | -1.24  |
| <b>C1-P</b>                          | 0.55                   | -0.47                            | -0.62  | -0.54  | -0.58  | -0.51  | -0.13  |
| <b>C2-P</b>                          | -0.21                  | -0.09                            | -0.14  | -0.06  | -0.09  | -0.11  | -0.17  |
| <i>R</i>                             |                        | 0.963                            | 0.921  | 0.875  | 0.886  | 0.917  | 0.933  |
| <i>Q</i>                             |                        | 0.509                            | 0.611  | 0.350  | 0.552  | 0.637  | 0.628  |

**Table S7:** Theoretical (calculated) RDCs of the low-energy **3-SR** conformers normalized against the 3B experimental dataset

| Atoms                                | Experimental RDCs [Hz] | Theoretical Normalized RDCs [Hz] |        |        |        |        |        |
|--------------------------------------|------------------------|----------------------------------|--------|--------|--------|--------|--------|
|                                      |                        | Conformer                        |        |        |        |        |        |
|                                      |                        | A                                | B      | C      | D      | E      | F      |
| <b>C4'-H4'</b>                       | 6.80                   | -12.17                           | -13.31 | -23.05 | -24.16 | -18.84 | -17.32 |
| <b>C1-H1</b>                         | 29.63                  | 27.87                            | 24.99  | 31.04  | 30.42  | 26.61  | 27.52  |
| <b>C2-H2</b>                         | 30.36                  | 27.55                            | 24.65  | 31.29  | 29.63  | 26.55  | 26.44  |
| <b>C5-H5</b>                         | 30.49                  | 29.03                            | 24.39  | 33.14  | 29.40  | 26.17  | 27.17  |
| <b>C7-H7</b>                         | -7.72                  | -11.56                           | -23.17 | 3.28   | -2.93  | -16.75 | -14.26 |
| <b>CH<sub>2</sub>-CH<sub>3</sub></b> | -0.24                  | 0.10                             | -2.25  | 3.06   | -0.30  | -0.04  | -1.31  |
| <b>C4'-P</b>                         | -0.07                  | -0.07                            | -0.07  | -0.13  | -0.13  | -0.10  | -0.09  |
| <b>C1'-P</b>                         | 0.76                   | -1.25                            | -1.04  | -2.49  | -2.07  | -1.51  | -1.52  |
| <b>C1-P</b>                          | 0.72                   | -0.58                            | -0.74  | -0.70  | -0.73  | -0.63  | -0.15  |
| <b>C2-P</b>                          | -0.25                  | -0.11                            | -0.17  | -0.08  | -0.12  | -0.13  | -0.21  |
| <i>R</i>                             |                        | 0.935                            | 0.910  | 0.814  | 0.833  | 0.887  | 0.901  |
| <i>Q</i>                             |                        | 0.506                            | 0.619  | 0.352  | 0.564  | 0.650  | 0.638  |

**Table S8:** Boltzmann distribution-weight averaged RDCs of **3-SR** conformers normalized against the 3A experimental dataset

| Atoms                            | Experimental RDCs [Hz] | Normalized Boltzmann averaged RDCs [Hz] |
|----------------------------------|------------------------|-----------------------------------------|
| C4'-H4'                          | 1.76                   | -10.57                                  |
| C1-H1                            | 24.13                  | 21.22                                   |
| C2-H2                            | 25.48                  | 20.96                                   |
| C5-H5                            | 25.63                  | 21.74                                   |
| C7-H7                            | -5.17                  | -10.03                                  |
| CH <sub>2</sub> -CH <sub>3</sub> | -0.09                  | -0.23                                   |
| C5-C8                            | -0.58                  | -1.10                                   |
| C4'-P                            | -0.01                  | -0.06                                   |
| C1'-P                            | 0.21                   | -1.01                                   |
| C1-P                             | 0.55                   | -0.48                                   |
| C2-P                             | -0.21                  | -0.10                                   |
| <i>R</i>                         |                        | 0.954                                   |

**Table S9:** Boltzmann distribution-weight averaged RDCs of **3-SR** conformers normalized against the 3B experimental dataset

| Atoms                            | Experimental RDCs [Hz] | Normalized Boltzmann averaged RDCs [Hz] |
|----------------------------------|------------------------|-----------------------------------------|
| C4'-H4'                          | 6.80                   | -13.00                                  |
| C1-H1                            | 29.63                  | 26.04                                   |
| C2-H2                            | 30.36                  | 25.73                                   |
| C5-H5                            | 30.49                  | 26.69                                   |
| C7-H7                            | -7.72                  | -12.21                                  |
| CH <sub>2</sub> -CH <sub>3</sub> | -0.24                  | -0.26                                   |
| C4'-P                            | -0.07                  | -0.07                                   |
| C1'-P                            | 0.76                   | -1.25                                   |
| C1-P                             | 0.72                   | -0.58                                   |
| C2-P                             | -0.25                  | -0.12                                   |
| <i>R</i>                         |                        | 0.925                                   |



## 2. MDOC Simulations

### 2.1. Parametrization of MDOC

MDOC stands for molecular dynamics with orientational constraints. These simulations use the COSMOS-NMR force field<sup>21, 22</sup> and two types of constraints from NMR measurements,<sup>23</sup> namely tensor constraints, such as NMR dipole-dipole tensors from RDC measurements, and scalar constraints, such as distances from NOE measurements or  $^3J$  couplings.<sup>24, 25</sup> The tensor constraints cause molecular rotations of the molecules and their mobile groups.

**Table S10:** General parameters of MDOC simulations

| Parameter                                                            | Value   |
|----------------------------------------------------------------------|---------|
| Target temperature                                                   | 290 K   |
| Compound <b>3</b>                                                    | 265 K   |
| MD time step                                                         | 0.5 fs  |
| BPT atomic charge calculation                                        | 2.0 fs  |
| Coupling time $\eta$ to the heat bath                                | 0.02 ps |
| Memory decay time $\tau$ for the property average                    | 200 ps  |
| Time constant $\rho$ for the exponential rise of pseudo-forces       | 200 ps  |
| Order parameter of the alignment medium $S_{am}$ (dipolar couplings) | 0.004   |
| Total MD duration                                                    | 40 ns   |

**Table S11:** Width and weight parameters of pseudo-forces in MDOC simulations

| Parameter                                                                               | Value  |
|-----------------------------------------------------------------------------------------|--------|
| Pseudo-force width $\Delta D$ for the one bond C-H couplings                            | 0.5 Hz |
| Weight parameter $k_D$ (one bond couplings [ $\text{kJ mol}^{-1} \text{Hz}^{-1}$ ])     | 0.003  |
| Pseudo-force width $\Delta D$ for the other RDC                                         | 0.2    |
| Weight parameter $k_D$ [ $\text{kJ mol}^{-1} \text{Hz}^{-1}$ ]                          | 0.01   |
| Pseudo-force width $\Delta J$ for the $^3J_{H-H}$ coupling constraints                  | 2.0 Hz |
| Weight parameter $k_J$ ( $^3J_{H-H}$ couplings [ $\text{kJ mol}^{-1} \text{Hz}^{-1}$ ]) | 12     |

## 2.2. Results of the compounds 1-SR and 1-RR

**Table S2:** The  $\chi$ -Probability and  $n/\chi^2$  values of compounds **1** with different datasets

| Dataset            | Structure | $\chi$ -Probability [%] | $n/\chi^2$ |
|--------------------|-----------|-------------------------|------------|
| 1A                 | 1-SR      | 90.3                    | 0.1948     |
| 1A                 | 1-RR      | 9.7                     | 0.1304     |
| 1B                 | 1-SR      | 52.9                    | 0.1176     |
| 1B                 | 1-RR      | 47.1                    | 0.1116     |
| 1A+ <sup>3</sup> J | 1-SR      | 95.9                    | 0.2160     |
| 1A+ <sup>3</sup> J | 1-RR      | 4.1                     | 0.1366     |
| 1B+ <sup>3</sup> J | 1-SR      | 2.8                     | 0.06977    |
| 1B+ <sup>3</sup> J | 1-RR      | 97.2                    | 0.1201     |

Based on the  $\chi$ -Probability, dataset 1A with <sup>3</sup>J couplings has a 95.5% probability of belonging to the structure **1-SR**, and dataset 1B with <sup>3</sup>J couplings has a 97.2 % probability of belonging to the structure **1-RR**.

**Table S11:** MDOC-simulated data of compound **1-SR** with the assigned dataset 1A

| Atoms |     | RDC calculated [Hz] | RDC experimental [Hz] | Difference [Hz] | Error [Hz] |
|-------|-----|---------------------|-----------------------|-----------------|------------|
| C1    | P   | 0.297               | 0.46                  | 0.163           | 0.05       |
| C2    | P   | 0.1045              | 0.17                  | 0.065           | 0.05       |
| H2    | C2  | -9.658              | -9.75                 | -0.092          | 0.06       |
| C3    | P   | -0.0364             | -0.01                 | 0.026           | 0.05       |
| C4    | P   | -0.04               | -0.09                 | -0.05           | 0.05       |
| C5    | P   | -0.0953             | -0.17                 | -0.075          | 0.05       |
| C1'   | P   | -1.342              | -1.54                 | -0.198          | 0.05       |
| C4'   | P   | -0.073              | 0.1                   | 0.173           | 0.05       |
| H4'   | C4' | -15.0295            | -15.1                 | -0.07           | 0.12       |

**Table S12:** MDOC-simulated data of compounds **1-RR** with the assigned dataset 1B

| Atoms |     | RDC<br>calculated<br>[Hz] | RDC<br>experimental<br>[Hz] | Difference<br>[Hz] | Error<br>[Hz] |
|-------|-----|---------------------------|-----------------------------|--------------------|---------------|
| C2    | P   | 0.1088                    | 0.37                        | 0.261              | 0.05          |
| H2    | C2  | -10.0875                  | -10.16                      | -0.073             | 0.07          |
| C3    | P   | 0.0383                    | 0.04                        | 0.002              | 0.05          |
| C4    | P   | -0.0222                   | -0.23                       | -0.208             | 0.05          |
| C5    | P   | -0.0934                   | -0.34                       | -0.247             | 0.05          |
| C1'   | P   | -0.6886                   | -0.75                       | -0.061             | 0.05          |
| C4'   | P   | -0.0373                   | -0.02                       | 0.017              | 0.05          |
| H4'   | C4' | -7.3303                   | -7.35                       | -0.02              | 0.07          |

**Table S13:** MDOC-simulated  $^3J$  couplings of compounds **1-SR** and **1-RR** with the assigned datasets and the assigned prochiral protons

| Dataset<br>Compound      | Atoms |          | $^3J$ MDOC<br>calc.<br>[ Hz ] | $^3J$ exp.<br>[ Hz ] | Error<br>+Error calc.<br>[ Hz ] |
|--------------------------|-------|----------|-------------------------------|----------------------|---------------------------------|
| <b>1A</b><br><b>1-SR</b> | H2    | H1A proS | 6.871                         | 6.6                  | 1.06                            |
| <b>1B</b><br><b>1-RR</b> | H2    | H1B proR | 5.534                         | 4.3                  | 0.72                            |
|                          | H2    | H1A proS | 8.463                         | 6.4                  | 0.67                            |

### 2.3. Results of the compounds 2-RR and 2-RS

**Table S14:** The  $\chi$ -Probability and  $n/\chi^2$  values of compounds **2-RS** and **2-RR** with different datasets

| Dataset            | Structure | $\chi$ -Probability [%] | $n/\chi^2$ |
|--------------------|-----------|-------------------------|------------|
| 2A                 | 2-RR      | 37.4                    | 0.1957     |
| 2A                 | 2-RS      | 62.6                    | 0.2157     |
| 2B                 | 2-RR      | 12.6                    | 0.1435     |
| 2B                 | 2-RS      | 87.4                    | 0.1872     |
| 2A+ <sup>3</sup> J | 2-RR      | 72.2                    | 0.2071     |
| 2A+ <sup>3</sup> J | 2-RS      | 27.8                    | 0.1995     |
| 2B+ <sup>3</sup> J | 2-RR      | 14.6                    | 0.1635     |
| 2B+ <sup>3</sup> J | 2-RS      | 85.4                    | 0.2043     |

Based on the  $\chi$ -Probability, dataset 2A with <sup>3</sup>J couplings has a 72.2% probability of belonging to the structure **2-RR**, and dataset 2B with <sup>3</sup>J couplings has a 85.4% probability of belonging to the structure **2-RS**.

**Table S15:** MDOC-simulated data of compound **2-RR** with the assigned dataset 2A

| Atoms   | RDC calculated [Hz] | RDC experimental [Hz] | Difference [Hz] | Error [Hz] |
|---------|---------------------|-----------------------|-----------------|------------|
| C1 P    | 0.5917              | 0.87                  | 0.278           | 0.05       |
| C2 P    | 0.2173              | 0.41                  | 0.193           | 0.05       |
| H2 C2   | -17.0653            | -17.16                | -0.095          | 0.04       |
| C3 P    | -0.0052             | -0.07                 | -0.065          | 0.05       |
| C4 P    | -0.0478             | -0.14                 | -0.092          | 0.05       |
| C5 P    | -0.1222             | -0.07                 | 0.052           | 0.05       |
| C3' P   | -0.0699             | -0.11                 | -0.04           | 0.05       |
| H3' C3' | -8.6162             | -8.64                 | -0.024          | 0.18       |
| C4' P   | -0.0443             | -0.21                 | -0.166          | 0.05       |
| H4' C4' | -13.8304            | -13.93                | -0.1            | 0.18       |
| C5' P   | -0.0378             | -0.02                 | 0.018           | 0.05       |
| H5' C5' | 14.5046             | 14.56                 | 0.055           | 1.28       |
| C6' P   | -0.0937             | -0.16                 | -0.066          | 0.05       |
| H6' C6' | -9.9651             | -10.03                | -0.065          | 0.36       |

**Table S16:** MDOC-simulated data of compound **2-RS** with the assigned dataset 2B

| Atoms |     | RDC<br>calculated<br>[Hz] | RDC<br>experimental<br>[Hz] | Difference<br>[Hz] | Error<br>[Hz] |
|-------|-----|---------------------------|-----------------------------|--------------------|---------------|
| C2    | P   | 0.1963                    | 0.21                        | 0.014              | 0.05          |
| C1    | P   | 0.5041                    | 0.86                        | 0.356              | 0.05          |
| C5    | P   | -0.2134                   | -0.29                       | -0.077             | 0.05          |
| C4    | P   | -0.0613                   | -0.21                       | -0.149             | 0.05          |
| C6    | P   | 0                         | 0                           | 0                  | 0.05          |
| C4'   | P   | 0.0035                    | -0.07                       | -0.074             | 0.05          |
| C5'   | P   | 0.0077                    | -0.04                       | -0.048             | 0.05          |
| C6'   | P   | 0.0171                    | 0.08                        | 0.063              | 0.05          |
| H3'   | C3' | -7.2009                   | -7.25                       | -0.049             | 0.03          |
| H3'   | C3' | -4.5282                   | -4.55                       | -0.022             | 0.06          |
| H4'   | C4' | 1.8554                    | 1.86                        | 0.005              | 0.13          |
| H5'   | C5' | -1.0748                   | -1.08                       | -0.005             | 0.17          |
| H6'   | C6' | -4.4204                   | -4.44                       | -0.02              | 0.17          |

**Table S17:** MDOC-simulated  $^3J$  couplings of compounds **2-RR** and **2-RS** with the assigned datasets 2A and 2B and the assigned prochiral protons

| Dataset<br>Compound      | Atoms |          | $^3J$ MDOC<br>calc.<br>[ Hz ] | $^3J$ exp.<br>[ Hz ] | Error<br>+Error calc.<br>[ Hz ] |
|--------------------------|-------|----------|-------------------------------|----------------------|---------------------------------|
| <b>2A</b><br><b>2-RR</b> | H2    | H1B proR | 5.796                         | 6.6                  | 0.82                            |
| <b>2B</b>                | H2    | H1B proR | 4.485                         | 6.6                  | 1.06                            |
| <b>2-RS</b>              | H2    | H1A proS | 9.101                         | 9.0                  | 1.36                            |

## 2.4. Results of compounds **3-RR** and **3-SR**

**Table S18:**  $\chi$ -Probability and  $n/\chi^2$  values of compounds **3-RR** and **3-SR** with different datasets

| Dataset | Structure | $\chi$ -Probability [%] | $n/\chi^2$ |
|---------|-----------|-------------------------|------------|
| 3A      | 3-RR      | 8.05                    | 2.406      |
| 3A      | 3-SR      | 46.94                   | 2.579      |
| 3B      | 3-RR      | 20.39                   | 1.323      |
| 3B      | 3-SR      | 79.61                   | 1.437      |
| 3A-ex   | 3-RR      | 18.14                   | 2.472      |
| 3A-ex   | 3-SR      | 26.87                   | 2.519      |

3A-ex: The dataset 3A-ex was introduced to solve the uncertainty in the assignment of  $^3J_{\text{H-H}}$ -couplings. In the dataset 3A-ex,  $^3J_{\text{H-H}}$ -couplings of the CH<sub>3</sub> protons of the groups C8a and C8b to H7 were interchanged with respect to the dataset 3A.

The  $\chi$ -probability did not allow a final assignment. Only a preliminary assignment was performed using the P-C1 RDC: dataset 3B was assigned to the structure **3-SR**, but dataset 3A was not assigned. The highest score of **3-RR** was derived from 3A-ex. Inspecting this value, we observed that in dataset 3B the value is lower (-0.72 Hz) than the value of dataset 3A or 3A-ex (-0.55 Hz). The assignment to the other datasets 3A and 3A-ex is inconclusive mainly because of the outlier of the P-C1 RDCs. If we preliminary assign **3-SR** to data set 3B and **3-RR** to 3A or 3A-ex (3A-ex was selected because of the larger  $\chi$ -probability) we get the same trend in the simulated RDC values (-0.552 < -0.469).

**Table S19:** MDOC-simulated RDC data of compound **3-RR** and the dataset 3Aex

| Atoms |       | RDC<br>calculated<br>[Hz] | RDC<br>experimental<br>[Hz] | Difference<br>[Hz] | Error<br>[Hz] |
|-------|-------|---------------------------|-----------------------------|--------------------|---------------|
| C1    | P     | -0.4689*                  | -0.550                      | -0.081*            | 0.05          |
| C2    | P     | -0.2209                   | -0.210                      | 0.011              | 0.05          |
| H1    | C1    | 24.0717                   | 24.130                      | 0.058              | 0.34          |
| H2    | C2    | 25.3593                   | 25.480                      | 0.121              | 0.32          |
| H5    | C5    | 25.5498                   | 25.630                      | 0.080              | 0.38          |
| H8a_1 | C8a   | 1.4096                    | 1.450                       | 0.040              | 0.06          |
| H8a_3 | C8a   | 1.4178                    | 1.450                       | 0.032              | 0.06          |
| C7    | H7    | -5.1401                   | -5.170                      | -0.030             | 0.04          |
| H8a_2 | C8a   | 1.4341                    | 1.450                       | 0.016              | 0.06          |
| C8b   | H8b_3 | -0.4558                   | -0.450                      | 0.006              | 0.06          |
| C8b   | H8b_1 | -0.4620                   | -0.450                      | 0.012              | 0.06          |
| C8b   | H8b_2 | -0.4645                   | -0.450                      | 0.014              | 0.06          |
| C11   | H11_2 | -0.5744                   | -0.580                      | -0.006             | 0.17          |
| C11   | H11_3 | -0.5818                   | -0.580                      | 0.002              | 0.17          |
| C11   | H11_1 | -0.5791                   | -0.580                      | -0.001             | 0.17          |
| C4'   | H4'   | 1.7407                    | 1.760                       | 0.019              | 0.23          |
| C4'   | P     | 0.0154                    | 0.010                       | -0.005             | 0.05          |
| C1'   | P     | 0.2386                    | 0.210                       | -0.029             | 0.05          |
| H10_2 | C10   | -0.0902                   | -0.090                      | 0.000              | 0.01          |
| H10_3 | C10   | -0.0909                   | -0.090                      | 0.001              | 0.01          |
| H10_1 | C10   | -0.0904                   | -0.090                      | 0.000              | 0.01          |

\*Outlier

**Table S20:** MDOC simulated RDC data of compound **3-SR** and the dataset 3B

| Atoms |       | RDC calculated [Hz] | RDC experimental [Hz] | Difference [Hz] | Error [Hz] |
|-------|-------|---------------------|-----------------------|-----------------|------------|
| C1p   | P     | 0.7746              | 0.760                 | -0.015          | 0.05       |
| C1    | P     | -0.5519*            | -0.720                | -0.168*         | 0.05       |
| C2    | P     | -0.2399             | -0.250                | -0.010          | 0.05       |
| C4p   | P     | 0.0475              | 0.070                 | 0.022           | 0.05       |
| H1    | C1    | 29.5381             | 29.630                | 0.092           | 0.17       |
| H2    | C2    | 30.2137             | 30.360                | 0.146           | 0.22       |
| H5    | C5    | 30.4000             | 30.490                | 0.090           | 0.15       |
| H8a_1 | C8a   | -0.5559             | -0.540                | 0.016           | 0.14       |
| H8a_3 | C8a   | -0.5523             | -0.540                | 0.012           | 0.14       |
| C7    | H7    | -7.6763             | -7.720                | -0.044          | 0.14       |
| H8a_2 | C8a   | -0.5478             | -0.540                | 0.008           | 0.14       |
| C8b   | H8b_3 | -0.5534             | -0.540                | 0.013           | 0.14       |
| C8b   | H8b_1 | -0.5590             | -0.540                | 0.019           | 0.14       |
| C8b   | H8b_2 | -0.5604             | -0.540                | 0.020           | 0.14       |
| H4p   | C4p   | 6.7860              | 6.800                 | 0.014           | 0.30       |
| H10_2 | C10   | -0.2409             | -0.240                | 0.001           | 0.08       |
| H10_3 | C10   | -0.2397             | -0.240                | -0.000          | 0.08       |
| H10_1 | C10   | -0.2363             | -0.240                | -0.004          | 0.08       |

\*Outlier

**Table S21:** MDOC-simulated  $^3J_{H-H}$ -couplings calculated from the MDOC trajectory of the compound **3-RR** and the dataset 3A-ex

| Atoms |       | $^3J$ calculated [Hz] | $^3J$ experimental [Hz] | Difference [Hz] | Error [Hz] |
|-------|-------|-----------------------|-------------------------|-----------------|------------|
| H7    | H8a_2 | 6.659                 | 6.900                   | -0.241          | 0.68       |
| H7    | H8a_3 | 6.659                 | 6.900                   | -0.241          | 0.68       |
| H7    | H8a_1 | 6.624                 | 6.900                   | -0.276          | 0.68       |
| H7    | H8b_3 | 6.699                 | 7.100                   | -0.401          | 0.68       |
| H7    | H8b_1 | 6.706                 | 7.100                   | -0.394          | 0.68       |
| H7    | H8b_2 | 6.691                 | 7.100                   | -0.409          | 0.68       |
| H9_2  | H10_1 | 6.263                 | 7.100                   | -0.837          | 0.66       |
| H9_2  | H10_3 | 6.226                 | 7.100                   | -0.874          | 0.66       |
| H9_2  | H10_2 | 6.302                 | 7.100                   | -0.798          | 0.66       |
| H9_1  | H10_1 | 6.513                 | 7.100                   | -0.587          | 0.66       |
| H9_1  | H10_3 | 6.534                 | 7.100                   | -0.566          | 0.66       |
| H9_1  | H10_2 | 6.507                 | 7.100                   | -0.593          | 0.66       |

Rotating CH<sub>3</sub> groups



**Table 22:** MDOC-simulated  $^3J_{\text{H-H}}$ -couplings calculated from the MDOC trajectory of compound **3-SR** and the dataset 3B

| Atoms |       | $^3J$ calculated [Hz] | $^3J$ experimental [Hz] | Difference [Hz] | Error [Hz] |
|-------|-------|-----------------------|-------------------------|-----------------|------------|
| H7    | H8a_2 | 6.723                 | 7.1                     | -0.377          | 0.7        |
| H7    | H8a_3 | 6.734                 | 7.1                     | -0.366          | 0.7        |
| H7    | H8a_1 | 6.712                 | 7.1                     | -0.388          | 0.7        |
| H7    | H8b_3 | 6.707                 | 7.1                     | -0.393          | 0.7        |
| H7    | H8b_1 | 6.706                 | 7.1                     | -0.394          | 0.7        |
| H7    | H8b_2 | 6.693                 | 7.1                     | -0.407          | 0.7        |
| H9_2  | H10_1 | 6.286                 | 7.1                     | -0.814          | 0.68       |
| H9_2  | H10_3 | 6.251                 | 7.1                     | -0.849          | 0.68       |
| H9_2  | H10_2 | 6.322                 | 7.1                     | -0.778          | 0.68       |
| H9_1  | H10_1 | 6.498                 | 7.1                     | -0.602          | 0.68       |
| H9_1  | H10_3 | 6.522                 | 7.1                     | -0.578          | 0.68       |
| H9_1  | H10_2 | 6.498                 | 7.1                     | -0.602          | 0.68       |

Rotating CH<sub>3</sub> groups

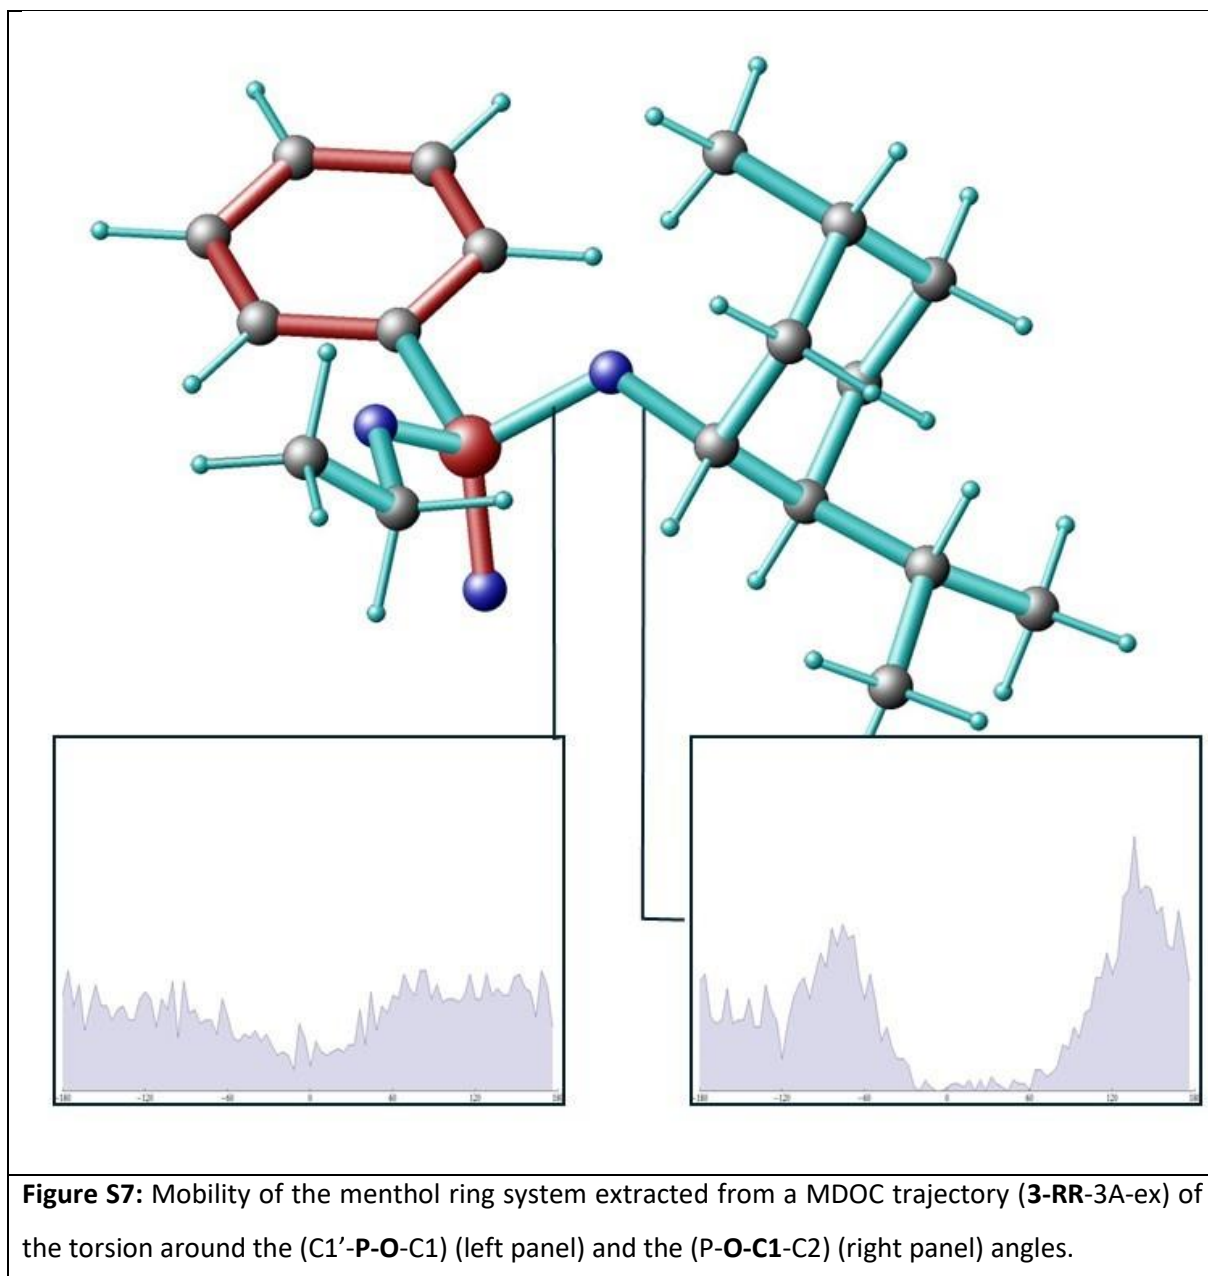

### 3. XYZ coordinates of low energy structures of 3

#### 3-RR - A

|   |          |          |          |
|---|----------|----------|----------|
| P | -0.58853 | -2.72199 | -3.34069 |
| O | 0.33590  | -1.94614 | -4.21650 |
| O | 0.14151  | -3.92190 | -2.52326 |
| C | -1.98837 | -3.45204 | -4.21256 |
| C | 1.18550  | -4.71260 | -3.16875 |
| C | 2.32369  | -4.92168 | -2.16171 |
| C | 3.38713  | -5.83125 | -2.81263 |
| C | 2.79239  | -7.16256 | -3.29526 |
| C | 1.63018  | -6.95131 | -4.27898 |
| C | 0.57520  | -6.03038 | -3.64424 |
| C | 2.87842  | -3.59086 | -1.58752 |
| C | 3.47828  | -2.64985 | -2.64589 |
| C | 3.88064  | -3.84187 | -0.44905 |
| C | 1.01126  | -8.27795 | -4.73235 |
| C | -2.94167 | -4.22824 | -3.53595 |
| C | -3.98612 | -4.82004 | -4.24591 |
| C | -4.07988 | -4.64320 | -5.63154 |
| C | -3.13069 | -3.87124 | -6.30666 |
| C | -2.08405 | -3.27369 | -5.59905 |
| O | -1.30968 | -1.93982 | -2.13102 |
| C | -0.49940 | -1.28622 | -1.11395 |
| C | -0.52416 | -2.09873 | 0.16977  |
| H | 1.55972  | -4.14580 | -4.02896 |
| H | 1.88899  | -5.47480 | -1.31371 |
| H | 4.19538  | -6.02504 | -2.10012 |
| H | 3.84140  | -5.31146 | -3.66681 |
| H | 3.57274  | -7.77489 | -3.76483 |
| H | 2.42370  | -7.73271 | -2.42916 |
| H | 2.03304  | -6.43927 | -5.16721 |
| H | -0.23143 | -5.82208 | -4.35646 |
| H | 0.11707  | -6.53239 | -2.78046 |
| H | 2.01577  | -3.07730 | -1.14693 |
| H | 3.83252  | -1.72892 | -2.16843 |
| H | 2.74446  | -2.36151 | -3.40426 |
| H | 4.34033  | -3.10564 | -3.14664 |
| H | 4.12520  | -2.90287 | 0.05989  |
| H | 3.47538  | -4.53363 | 0.29934  |
| H | 4.82141  | -4.26289 | -0.82160 |
| H | 0.19968  | -8.11367 | -5.45021 |
| H | 1.75935  | -8.92183 | -5.20862 |
| H | 0.59560  | -8.82391 | -3.87611 |
| H | -2.86240 | -4.36721 | -2.46223 |
| H | -4.72526 | -5.41931 | -3.72229 |
| H | -4.89329 | -5.10698 | -6.18235 |
| H | -3.20460 | -3.73265 | -7.38128 |
| H | -1.33782 | -2.67102 | -6.10746 |
| H | 0.52062  | -1.14750 | -1.48834 |
| H | -0.94635 | -0.29800 | -0.97562 |
| H | -1.55137 | -2.21580 | 0.52848  |
| H | -0.09818 | -3.09083 | 0.00032  |
| H | 0.05900  | -1.59013 | 0.94586  |

**3-RR - B**

|   |          |          |          |
|---|----------|----------|----------|
| P | -0.58776 | -2.83475 | -3.19856 |
| O | 0.29773  | -1.97531 | -4.03606 |
| O | 0.18046  | -4.06869 | -2.47664 |
| C | -1.98949 | -3.53652 | -4.09088 |
| C | 1.22531  | -4.79530 | -3.19240 |
| C | 2.39319  | -5.03754 | -2.22775 |
| C | 3.46006  | -5.87925 | -2.95937 |
| C | 2.88385  | -7.19315 | -3.50784 |
| C | 1.69168  | -6.95135 | -4.44770 |
| C | 0.63278  | -6.09637 | -3.73223 |
| C | 2.93066  | -3.73094 | -1.58566 |
| C | 3.48325  | -2.71269 | -2.59720 |
| C | 3.96644  | -4.02652 | -0.48854 |
| C | 1.09149  | -8.26294 | -4.96553 |
| C | -2.12658 | -3.25551 | -5.45676 |
| C | -3.17597 | -3.82602 | -6.18243 |
| C | -4.08699 | -4.67295 | -5.54570 |
| C | -3.95197 | -4.95242 | -4.18054 |
| C | -2.90443 | -4.38810 | -3.45295 |
| O | -1.30005 | -2.15014 | -1.92457 |
| C | -0.47898 | -1.49438 | -0.92011 |
| C | -1.38466 | -0.59991 | -0.09576 |
| H | 1.56556  | -4.16965 | -4.02567 |
| H | 1.99283  | -5.65177 | -1.40543 |
| H | 4.29105  | -6.09614 | -2.28043 |
| H | 3.87965  | -5.29753 | -3.79110 |
| H | 3.66548  | -7.75652 | -4.03328 |
| H | 2.55123  | -7.82368 | -2.66943 |
| H | 2.05935  | -6.37707 | -5.31285 |
| H | -0.19653 | -5.86535 | -4.41061 |
| H | 0.20892  | -6.66058 | -2.88966 |
| H | 2.06633  | -3.26666 | -1.09563 |
| H | 3.82781  | -1.81456 | -2.07164 |
| H | 2.72497  | -2.39564 | -3.31912 |
| H | 4.34321  | -3.11603 | -3.14453 |
| H | 4.20104  | -3.11492 | 0.07232  |
| H | 3.59682  | -4.77362 | 0.22425  |
| H | 4.90764  | -4.39928 | -0.90850 |
| H | 0.71085  | -8.86939 | -4.13407 |
| H | 0.25791  | -8.07556 | -5.65185 |
| H | 1.84137  | -8.85861 | -5.49835 |
| H | -1.40991 | -2.59547 | -5.93564 |
| H | -3.28168 | -3.60821 | -7.24114 |
| H | -4.90249 | -5.11571 | -6.11056 |
| H | -4.66133 | -5.61010 | -3.68669 |
| H | -2.79273 | -4.60700 | -2.39554 |
| H | -0.00920 | -2.26921 | -0.30444 |
| H | 0.30574  | -0.91685 | -1.42109 |
| H | -0.80314 | -0.10310 | 0.68840  |
| H | -1.84675 | 0.16501  | -0.72648 |
| H | -2.17803 | -1.18624 | 0.37765  |

**3-RR - C**

|   |          |          |          |
|---|----------|----------|----------|
| P | -0.40944 | -3.25928 | -3.99474 |
| O | 0.02241  | -2.80005 | -5.34584 |
| O | 0.14106  | -4.66936 | -3.45638 |
| C | -2.19228 | -3.46617 | -3.81267 |
| C | 1.58224  | -4.91989 | -3.40782 |
| C | 1.89976  | -5.61058 | -2.07549 |
| C | 3.39050  | -6.00927 | -2.07112 |
| C | 3.76286  | -6.88156 | -3.27838 |
| C | 3.43239  | -6.18337 | -4.60766 |
| C | 1.95169  | -5.77012 | -4.62132 |
| C | 1.45744  | -4.78232 | -0.83963 |
| C | 2.28584  | -3.50710 | -0.61337 |
| C | 1.43568  | -5.64280 | 0.43409  |
| C | 3.77594  | -7.05766 | -5.81852 |
| C | -3.01778 | -3.18357 | -4.90879 |
| C | -4.40461 | -3.30317 | -4.78441 |
| C | -4.96558 | -3.70493 | -3.56917 |
| C | -4.14128 | -3.98940 | -2.47403 |
| C | -2.75674 | -3.86920 | -2.59287 |
| O | 0.07869  | -2.27799 | -2.78946 |
| C | 0.20411  | -0.84999 | -3.01015 |
| C | -1.12071 | -0.13589 | -2.78379 |
| H | 2.10674  | -3.95769 | -3.45917 |
| H | 1.30488  | -6.53715 | -2.06896 |
| H | 3.62926  | -6.53516 | -1.14049 |
| H | 4.01140  | -5.10343 | -2.08495 |
| H | 4.82998  | -7.13565 | -3.24384 |
| H | 3.21060  | -7.83205 | -3.22929 |
| H | 4.04059  | -5.26643 | -4.66377 |
| H | 1.70863  | -5.21087 | -5.53116 |
| H | 1.31940  | -6.66887 | -4.61243 |
| H | 0.42665  | -4.46760 | -1.03910 |
| H | 1.84700  | -2.91452 | 0.19703  |
| H | 2.30520  | -2.87222 | -1.50344 |
| H | 3.31784  | -3.74053 | -0.32785 |
| H | 2.44311  | -5.96110 | 0.72660  |
| H | 1.01710  | -5.07739 | 1.27438  |
| H | 0.82496  | -6.54308 | 0.29823  |
| H | 4.83739  | -7.33068 | -5.82140 |
| H | 3.19100  | -7.98585 | -5.80407 |
| H | 3.55677  | -6.53873 | -6.75830 |
| H | -2.56564 | -2.87357 | -5.84594 |
| H | -5.04402 | -3.08487 | -5.63470 |
| H | -6.04368 | -3.79812 | -3.47363 |
| H | -4.57829 | -4.30358 | -1.53066 |
| H | -2.11441 | -4.08844 | -1.74552 |
| H | 0.95735  | -0.52351 | -2.28734 |
| H | 0.58691  | -0.67940 | -4.02146 |
| H | -0.97912 | 0.94706  | -2.87181 |
| H | -1.86682 | -0.44463 | -3.52222 |
| H | -1.51187 | -0.35745 | -1.78611 |

**3-RR - D**

|   |          |          |          |
|---|----------|----------|----------|
| P | -0.31502 | -3.21303 | -3.90941 |
| O | 0.30098  | -2.78542 | -5.19784 |
| O | 0.20031  | -4.58104 | -3.24524 |
| C | -2.10207 | -3.45598 | -3.98719 |
| C | 1.62670  | -4.92145 | -3.26037 |
| C | 1.95425  | -5.69710 | -1.97845 |
| C | 3.40533  | -6.22461 | -2.07912 |
| C | 3.66446  | -7.04571 | -3.34792 |
| C | 3.33687  | -6.24157 | -4.61453 |
| C | 1.89130  | -5.73009 | -4.53161 |
| C | 1.73706  | -4.93113 | -0.64118 |
| C | 0.26035  | -4.80567 | -0.22646 |
| C | 2.41323  | -3.54915 | -0.59905 |
| C | 3.56533  | -7.05625 | -5.89226 |
| C | -2.75650 | -3.22555 | -5.20490 |
| C | -4.14199 | -3.38635 | -5.29243 |
| C | -4.87282 | -3.77754 | -4.16748 |
| C | -4.22057 | -4.00776 | -2.95052 |
| C | -2.83816 | -3.84574 | -2.85740 |
| O | -0.05112 | -2.18068 | -2.67654 |
| C | -0.21962 | -0.75823 | -2.90159 |
| C | 0.26963  | -0.03612 | -1.65998 |
| H | 2.20796  | -3.99179 | -3.28959 |
| H | 1.28597  | -6.57161 | -1.96755 |
| H | 3.62230  | -6.82678 | -1.18863 |
| H | 4.10470  | -5.37769 | -2.05722 |
| H | 4.70945  | -7.38048 | -3.37154 |
| H | 3.04226  | -7.95320 | -3.33290 |
| H | 4.00671  | -5.36729 | -4.64093 |
| H | 1.64689  | -5.10564 | -5.39693 |
| H | 1.20016  | -6.58472 | -4.53803 |
| H | 2.22478  | -5.55779 | 0.12053  |
| H | 0.18999  | -4.48466 | 0.81969  |
| H | -0.26631 | -5.76184 | -0.32300 |
| H | -0.25739 | -4.06641 | -0.83972 |
| H | 2.35460  | -3.13329 | 0.41318  |
| H | 3.47228  | -3.59444 | -0.87382 |
| H | 1.90901  | -2.84738 | -1.26971 |
| H | 2.91479  | -7.93973 | -5.90931 |
| H | 3.34649  | -6.46223 | -6.78648 |
| H | 4.60286  | -7.40291 | -5.96051 |
| H | -2.17353 | -2.92435 | -6.06984 |
| H | -4.64783 | -3.20825 | -6.23683 |
| H | -5.94958 | -3.90377 | -4.23675 |
| H | -4.78910 | -4.31327 | -2.07698 |
| H | -2.33111 | -4.02712 | -1.91511 |
| H | 0.35022  | -0.47043 | -3.79113 |
| H | -1.28246 | -0.55304 | -3.08558 |
| H | 0.14716  | 1.04516  | -1.78369 |
| H | -0.29783 | -0.35357 | -0.77990 |
| H | 1.32812  | -0.24931 | -1.48365 |

**3-RR - E**

|   |          |          |          |
|---|----------|----------|----------|
| P | -0.32476 | -3.27426 | -4.01423 |
| O | 0.04158  | -2.93235 | -5.41839 |
| O | 0.24824  | -4.63914 | -3.38477 |
| C | -2.09946 | -3.45570 | -3.73987 |
| C | 1.68347  | -4.86746 | -3.21378 |
| C | 1.87193  | -5.95790 | -2.15092 |
| C | 3.38701  | -6.23071 | -2.01285 |
| C | 4.04952  | -6.60241 | -3.34599 |
| C | 3.81327  | -5.53194 | -4.42244 |
| C | 2.30722  | -5.25412 | -4.55639 |
| C | 1.21887  | -5.67152 | -0.76752 |
| C | -0.26209 | -6.08271 | -0.71380 |
| C | 1.40413  | -4.22256 | -0.28595 |
| C | 4.42778  | -5.92598 | -5.77004 |
| C | -2.94452 | -3.58182 | -4.85049 |
| C | -4.32300 | -3.71442 | -4.66428 |
| C | -4.85757 | -3.71737 | -3.37290 |
| C | -4.01516 | -3.58372 | -2.26326 |
| C | -2.63841 | -3.45148 | -2.44446 |
| O | 0.20561  | -2.19505 | -2.91574 |
| C | 0.34309  | -0.79480 | -3.27387 |
| C | -0.96735 | -0.04375 | -3.08873 |
| H | 2.12790  | -3.93016 | -2.85661 |
| H | 1.40835  | -6.87117 | -2.55326 |
| H | 3.53646  | -7.03554 | -1.28331 |
| H | 3.88018  | -5.34023 | -1.59704 |
| H | 5.12594  | -6.76060 | -3.20126 |
| H | 3.63592  | -7.55785 | -3.70229 |
| H | 4.29885  | -4.60251 | -4.08375 |
| H | 2.12156  | -4.45826 | -5.28423 |
| H | 1.79622  | -6.15334 | -4.92774 |
| H | 1.74956  | -6.31896 | -0.05374 |
| H | -0.66459 | -5.93879 | 0.29617  |
| H | -0.38594 | -7.14032 | -0.97470 |
| H | -0.86287 | -5.49799 | -1.41259 |
| H | 0.83405  | -3.51924 | -0.90010 |
| H | 1.05911  | -4.12230 | 0.74927  |
| H | 2.45581  | -3.91465 | -0.31186 |
| H | 4.27191  | -5.14415 | -6.52154 |
| H | 5.50617  | -6.09909 | -5.67807 |
| H | 3.97097  | -6.84908 | -6.14817 |
| H | -2.51584 | -3.56655 | -5.84779 |
| H | -4.97732 | -3.81262 | -5.52550 |
| H | -5.92950 | -3.81971 | -3.22955 |
| H | -4.43131 | -3.58081 | -1.26006 |
| H | -1.98390 | -3.33732 | -1.58626 |
| H | 1.11720  | -0.41201 | -2.60295 |
| H | 0.70268  | -0.72735 | -4.30541 |
| H | -1.33735 | -0.15834 | -2.06527 |
| H | -0.81427 | 1.02284  | -3.28745 |
| H | -1.73442 | -0.41311 | -3.77597 |

**3-RR - F**

|   |          |          |          |
|---|----------|----------|----------|
| P | -0.50623 | -3.45180 | -4.22568 |
| O | -0.17666 | -3.50197 | -5.67915 |
| O | 0.05375  | -4.63545 | -3.28482 |
| C | -2.26968 | -3.49692 | -3.85199 |
| C | 1.48701  | -4.82767 | -3.07664 |
| C | 1.68420  | -5.62162 | -1.77886 |
| C | 3.19963  | -5.86286 | -1.59325 |
| C | 3.84717  | -6.55268 | -2.80122 |
| C | 3.60374  | -5.77543 | -4.10394 |
| C | 2.09696  | -5.53459 | -4.28875 |
| C | 1.05109  | -4.99173 | -0.50423 |
| C | -0.43378 | -5.35469 | -0.33511 |
| C | 1.25873  | -3.47106 | -0.40076 |
| C | 4.20690  | -6.48661 | -5.32014 |
| C | -3.15772 | -3.91432 | -4.85237 |
| C | -4.52855 | -3.96695 | -4.58708 |
| C | -5.01225 | -3.59999 | -3.32826 |
| C | -4.12673 | -3.17437 | -2.33161 |
| C | -2.75716 | -3.12088 | -2.59122 |
| O | 0.07254  | -2.13239 | -3.46742 |
| C | 0.64506  | -1.03312 | -4.22353 |
| C | 2.15068  | -1.20232 | -4.34811 |
| H | 1.94214  | -3.83573 | -2.96456 |
| H | 1.21056  | -6.60246 | -1.93480 |
| H | 3.35390  | -6.46574 | -0.69047 |
| H | 3.70102  | -4.90105 | -1.41264 |
| H | 4.92439  | -6.67717 | -2.63182 |
| H | 3.42657  | -7.56359 | -2.91042 |
| H | 4.09295  | -4.79282 | -4.00459 |
| H | 1.90408  | -4.94189 | -5.18846 |
| H | 1.58161  | -6.49550 | -4.42438 |
| H | 1.58384  | -5.44839 | 0.34310  |
| H | -0.81880 | -4.96351 | 0.61434  |
| H | -0.57427 | -6.44193 | -0.32942 |
| H | -1.03844 | -4.94763 | -1.14745 |
| H | 0.92991  | -3.11115 | 0.58050  |
| H | 2.31306  | -3.19344 | -0.51470 |
| H | 0.68712  | -2.93492 | -1.16406 |
| H | 4.04498  | -5.91066 | -6.23801 |
| H | 5.28592  | -6.63482 | -5.19756 |
| H | 3.74651  | -7.47273 | -5.45892 |
| H | -2.76878 | -4.18695 | -5.82857 |
| H | -5.21643 | -4.29125 | -5.36237 |
| H | -6.07833 | -3.64098 | -3.12360 |
| H | -4.50367 | -2.88365 | -1.35542 |
| H | -2.06905 | -2.78358 | -1.82268 |
| H | 0.17439  | -0.98333 | -5.20990 |
| H | 0.38722  | -0.13370 | -3.65746 |
| H | 2.61152  | -1.29584 | -3.35952 |
| H | 2.58598  | -0.33259 | -4.85295 |
| H | 2.38582  | -2.09431 | -4.93626 |



**3-RR - G**

|   |          |          |          |
|---|----------|----------|----------|
| P | -0.28880 | -3.21155 | -3.80292 |
| O | 0.24588  | -2.78385 | -5.12785 |
| O | 0.23902  | -4.59675 | -3.18407 |
| C | -2.07990 | -3.43375 | -3.76647 |
| C | 1.66303  | -4.93923 | -3.25442 |
| C | 2.03690  | -5.73357 | -1.99671 |
| C | 3.48062  | -6.26566 | -2.16015 |
| C | 3.68831  | -7.06926 | -3.44935 |
| C | 3.31761  | -6.24491 | -4.69078 |
| C | 1.87825  | -5.72991 | -4.54643 |
| C | 1.87579  | -4.98600 | -0.64126 |
| C | 2.56655  | -3.61099 | -0.60173 |
| C | 0.41667  | -4.85231 | -0.17108 |
| C | 3.49520  | -7.04088 | -5.98822 |
| C | -2.74942 | -3.83612 | -2.60093 |
| C | -4.13839 | -3.96513 | -2.60681 |
| C | -4.86341 | -3.69032 | -3.77215 |
| C | -4.19794 | -3.28997 | -4.93391 |
| C | -2.80639 | -3.16197 | -4.93370 |
| O | 0.08492  | -2.18850 | -2.59143 |
| C | 0.17039  | -0.76060 | -2.83604 |
| C | -1.19014 | -0.09172 | -2.70185 |
| H | 2.24510  | -4.01012 | -3.29105 |
| H | 1.36545  | -6.60538 | -1.97175 |
| H | 3.72842  | -6.88132 | -1.28710 |
| H | 4.18429  | -5.42209 | -2.15286 |
| H | 4.73011  | -7.40797 | -3.51674 |
| H | 3.06285  | -7.97428 | -3.42451 |
| H | 3.98977  | -5.37279 | -4.72882 |
| H | 1.60342  | -5.09242 | -5.39293 |
| H | 1.18426  | -6.58218 | -4.53962 |
| H | 2.38453  | -5.62908 | 0.09251  |
| H | 2.04519  | -2.89464 | -1.24380 |
| H | 3.61469  | -3.66099 | -0.91461 |
| H | 2.54779  | -3.21113 | 0.41839  |
| H | 0.38740  | -4.55341 | 0.88349  |
| H | -0.11209 | -4.09276 | -0.74909 |
| H | -0.12605 | -5.79916 | -0.26995 |
| H | 3.24577  | -6.43262 | -6.86468 |
| H | 4.52806  | -7.39012 | -6.10012 |
| H | 2.84087  | -7.92168 | -5.99442 |
| H | -2.18746 | -4.05104 | -1.69796 |
| H | -4.65561 | -4.27917 | -1.70485 |
| H | -5.94513 | -3.79019 | -3.77310 |
| H | -4.75946 | -3.07945 | -5.83940 |
| H | -2.27421 | -2.85334 | -5.82828 |
| H | 0.86800  | -0.39152 | -2.07885 |
| H | 0.60616  | -0.59645 | -3.82676 |
| H | -1.08145 | 0.99375  | -2.80428 |
| H | -1.88104 | -0.44113 | -3.47491 |
| H | -1.63055 | -0.30818 | -1.72379 |

**3-RR - H**

|   |          |          |          |
|---|----------|----------|----------|
| P | -0.43743 | -2.85090 | -3.29362 |
| O | 0.33881  | -2.10925 | -4.32845 |
| O | 0.40744  | -4.00435 | -2.52426 |
| C | -1.94083 | -3.64155 | -3.90229 |
| C | 1.46199  | -4.73666 | -3.22044 |
| C | 2.39943  | -5.34091 | -2.16733 |
| C | 3.48368  | -6.15991 | -2.90262 |
| C | 2.89206  | -7.23183 | -3.82747 |
| C | 1.91858  | -6.63002 | -4.85228 |
| C | 0.84458  | -5.80562 | -4.12444 |
| C | 3.03030  | -4.31875 | -1.17771 |
| C | 2.12159  | -4.03106 | 0.02982  |
| C | 3.48868  | -3.01448 | -1.85138 |
| C | 1.28593  | -7.70304 | -5.74512 |
| C | -2.68985 | -4.50360 | -3.08760 |
| C | -3.83225 | -5.12183 | -3.59641 |
| C | -4.22660 | -4.88599 | -4.91854 |
| C | -3.47940 | -4.02939 | -5.73168 |
| C | -2.33606 | -3.40549 | -5.22561 |
| O | -0.99195 | -1.98861 | -2.04686 |
| C | -0.13827 | -0.98148 | -1.43809 |
| C | -0.97698 | -0.22158 | -0.42888 |
| H | 2.01024  | -4.01559 | -3.83724 |
| H | 1.79823  | -6.04777 | -1.57543 |
| H | 4.13983  | -6.62789 | -2.15909 |
| H | 4.11623  | -5.48003 | -3.49112 |
| H | 3.69630  | -7.77055 | -4.34453 |
| H | 2.35282  | -7.97614 | -3.22218 |
| H | 2.49027  | -5.94205 | -5.49484 |
| H | 0.18188  | -5.32963 | -4.85571 |
| H | 0.21847  | -6.46699 | -3.50942 |
| H | 3.93221  | -4.80785 | -0.78087 |
| H | 2.61460  | -3.34673 | 0.73066  |
| H | 1.88950  | -4.95448 | 0.57351  |
| H | 1.17466  | -3.58746 | -0.28456 |
| H | 2.63995  | -2.42556 | -2.21202 |
| H | 4.04570  | -2.39565 | -1.13924 |
| H | 4.14634  | -3.20505 | -2.70655 |
| H | 2.05226  | -8.27200 | -6.28373 |
| H | 0.70213  | -8.41182 | -5.14450 |
| H | 0.61202  | -7.25762 | -6.48553 |
| H | -2.37563 | -4.69126 | -2.06550 |
| H | -4.41293 | -5.78874 | -2.96576 |
| H | -5.11468 | -5.37136 | -5.31331 |
| H | -3.78448 | -3.84767 | -6.75806 |
| H | -1.74087 | -2.74275 | -5.84635 |
| H | 0.70878  | -1.47975 | -0.95477 |
| H | 0.24532  | -0.32466 | -2.22571 |
| H | -0.36753 | 0.54937  | 0.05481  |
| H | -1.82632 | 0.26169  | -0.92067 |
| H | -1.35987 | -0.89761 | 0.34159  |

**3-RS – A**

|   |          |          |          |
|---|----------|----------|----------|
| P | -0.94254 | 3.41337  | 2.80506  |
| O | 0.39454  | 3.95474  | 3.18057  |
| O | -0.90947 | 2.36328  | 1.56584  |
| C | -1.80575 | 2.58893  | 4.15771  |
| C | 0.19187  | 1.40943  | 1.46411  |
| C | -0.37604 | 0.07473  | 0.96362  |
| C | 0.79571  | -0.90638 | 0.75096  |
| C | 1.86011  | -0.34104 | -0.20050 |
| C | 2.41070  | 1.00640  | 0.29427  |
| C | 1.25082  | 1.98816  | 0.52801  |
| C | -1.51777 | -0.47543 | 1.85799  |
| C | -1.06677 | -0.89409 | 3.26675  |
| C | -2.26958 | -1.62732 | 1.17162  |
| C | 3.44969  | 1.59205  | -0.66806 |
| C | -1.12165 | 2.38703  | 5.36378  |
| C | -1.73970 | 1.69292  | 6.40733  |
| C | -3.03918 | 1.20472  | 6.24874  |
| C | -3.72676 | 1.41304  | 5.04738  |
| C | -3.11286 | 2.10289  | 4.00239  |
| O | -2.05502 | 4.45054  | 2.27065  |
| C | -1.75259 | 5.28312  | 1.11790  |
| C | -2.91508 | 6.23773  | 0.92502  |
| H | 0.63277  | 1.27407  | 2.46009  |
| H | -0.81921 | 0.28433  | -0.02259 |
| H | 0.41608  | -1.85760 | 0.36313  |
| H | 1.26623  | -1.12948 | 1.71810  |
| H | 2.68044  | -1.06065 | -0.31779 |
| H | 1.42004  | -0.19951 | -1.19919 |
| H | 2.90326  | 0.83098  | 1.26384  |
| H | 1.61529  | 2.92908  | 0.95304  |
| H | 0.76774  | 2.22185  | -0.43167 |
| H | -2.22913 | 0.34975  | 1.97477  |
| H | -1.93668 | -1.16159 | 3.87567  |
| H | -0.54735 | -0.08827 | 3.79315  |
| H | -0.40335 | -1.76576 | 3.23543  |
| H | -3.15159 | -1.91240 | 1.75619  |
| H | -2.60950 | -1.34222 | 0.16898  |
| H | -1.64272 | -2.52112 | 1.07277  |
| H | 3.85013  | 2.53973  | -0.29111 |
| H | 4.28945  | 0.90263  | -0.81209 |
| H | 3.00183  | 1.78440  | -1.65122 |
| H | -0.11392 | 2.77630  | 5.47145  |
| H | -1.20791 | 1.53544  | 7.34103  |
| H | -3.51855 | 0.66399  | 7.05986  |
| H | -4.73861 | 1.03713  | 4.92685  |
| H | -3.64245 | 2.26584  | 3.06903  |
| H | -0.81764 | 5.82161  | 1.30777  |
| H | -1.61586 | 4.63288  | 0.24671  |
| H | -3.04616 | 6.86792  | 1.80953  |
| H | -2.72651 | 6.88328  | 0.06046  |
| H | -3.84331 | 5.68496  | 0.75117  |

**3-RS – B**

|   |          |          |          |
|---|----------|----------|----------|
| P | -0.76258 | 2.71392  | 3.15947  |
| O | 0.42158  | 2.64636  | 4.06407  |
| O | -0.95181 | 1.53714  | 2.08306  |
| C | -2.34903 | 2.69249  | 4.01763  |
| C | 0.15062  | 1.19095  | 1.18364  |
| C | 0.32784  | -0.33237 | 1.20329  |
| C | 1.41911  | -0.70504 | 0.17727  |
| C | 1.09729  | -0.17882 | -1.22922 |
| C | 0.88853  | 1.34434  | -1.23865 |
| C | -0.18470 | 1.72697  | -0.20605 |
| C | 0.55887  | -0.90490 | 2.62713  |
| C | 1.85863  | -0.42619 | 3.29504  |
| C | 0.47953  | -2.44056 | 2.63153  |
| C | 0.53026  | 1.86738  | -2.63393 |
| C | -2.35565 | 2.58232  | 5.41450  |
| C | -3.56939 | 2.58979  | 6.10704  |
| C | -4.77318 | 2.70653  | 5.40684  |
| C | -4.76726 | 2.81558  | 4.01124  |
| C | -3.55812 | 2.81023  | 3.31570  |
| O | -0.75874 | 4.02161  | 2.18779  |
| C | -0.19828 | 5.27516  | 2.65968  |
| C | -1.21620 | 6.07745  | 3.45793  |
| H | 1.06485  | 1.66983  | 1.55548  |
| H | -0.62429 | -0.75355 | 0.84359  |
| H | 1.54175  | -1.79253 | 0.14694  |
| H | 2.38363  | -0.29153 | 0.50112  |
| H | 1.90072  | -0.45030 | -1.92589 |
| H | 0.18168  | -0.66363 | -1.60021 |
| H | 1.83654  | 1.81325  | -0.92992 |
| H | -0.30530 | 2.81385  | -0.14840 |
| H | -1.15413 | 1.30830  | -0.51097 |
| H | -0.27561 | -0.53681 | 3.23627  |
| H | 1.93629  | -0.85028 | 4.30242  |
| H | 1.88604  | 0.66122  | 3.40592  |
| H | 2.74348  | -0.75216 | 2.73575  |
| H | 0.48102  | -2.82034 | 3.65918  |
| H | -0.43516 | -2.79817 | 2.14345  |
| H | 1.33502  | -2.89375 | 2.11716  |
| H | 0.40727  | 2.95641  | -2.63164 |
| H | 1.30888  | 1.61621  | -3.36317 |
| H | -0.41108 | 1.42492  | -2.98328 |
| H | -1.41134 | 2.49348  | 5.94282  |
| H | -3.57414 | 2.50374  | 7.18966  |
| H | -5.71620 | 2.71220  | 5.94609  |
| H | -5.70358 | 2.90500  | 3.46816  |
| H | -3.54922 | 2.89608  | 2.23348  |
| H | 0.69836  | 5.06164  | 3.25024  |
| H | 0.09602  | 5.80583  | 1.75000  |
| H | -0.79419 | 7.05388  | 3.72077  |
| H | -2.12683 | 6.23636  | 2.87233  |
| H | -1.48830 | 5.56255  | 4.38418  |

**3-RS – C**

|   |          |          |          |
|---|----------|----------|----------|
| P | -0.91839 | 3.34973  | 2.93214  |
| O | 0.44348  | 3.86134  | 3.25609  |
| O | -0.94405 | 2.26980  | 1.71402  |
| C | -1.76264 | 2.59059  | 4.33317  |
| C | 0.15538  | 1.32784  | 1.51810  |
| C | -0.38828 | 0.09243  | 0.78545  |
| C | 0.79744  | -0.85476 | 0.48819  |
| C | 1.92951  | -0.17402 | -0.29107 |
| C | 2.44449  | 1.07882  | 0.43265  |
| C | 1.26894  | 2.02213  | 0.73044  |
| C | -1.54681 | -0.66872 | 1.49202  |
| C | -2.92386 | -0.02601 | 1.25528  |
| C | -1.30658 | -0.91010 | 2.99178  |
| C | 3.54317  | 1.79324  | -0.36171 |
| C | -0.99835 | 2.23423  | 5.45301  |
| C | -1.60051 | 1.56959  | 6.52426  |
| C | -2.96446 | 1.26822  | 6.48238  |
| C | -3.73161 | 1.63684  | 5.37143  |
| C | -3.13382 | 2.29566  | 4.29741  |
| O | -2.02308 | 4.39804  | 2.40640  |
| C | -1.79681 | 5.12133  | 1.16406  |
| C | -2.63207 | 4.51547  | 0.04837  |
| H | 0.53979  | 1.03082  | 2.50281  |
| H | -0.77294 | 0.45003  | -0.18199 |
| H | 0.42509  | -1.72113 | -0.07146 |
| H | 1.19644  | -1.24621 | 1.43462  |
| H | 2.75241  | -0.88152 | -0.45509 |
| H | 1.56225  | 0.11831  | -1.28650 |
| H | 2.87201  | 0.75934  | 1.39641  |
| H | 1.60597  | 2.89462  | 1.29700  |
| H | 0.84107  | 2.38439  | -0.21581 |
| H | -1.57724 | -1.65654 | 1.00855  |
| H | -3.71726 | -0.65559 | 1.67514  |
| H | -2.98613 | 0.95927  | 1.71920  |
| H | -3.12254 | 0.09461  | 0.18380  |
| H | -1.37564 | 0.01804  | 3.56505  |
| H | -2.06402 | -1.59332 | 3.39101  |
| H | -0.32535 | -1.35736 | 3.18471  |
| H | 3.16011  | 2.13371  | -1.33206 |
| H | 3.91609  | 2.67077  | 0.17788  |
| H | 4.39156  | 1.12610  | -0.55257 |
| H | 0.05775  | 2.48452  | 5.47516  |
| H | -1.00673 | 1.29175  | 7.39004  |
| H | -3.43177 | 0.75121  | 7.31565  |
| H | -4.79325 | 1.40966  | 5.34287  |
| H | -3.72566 | 2.58419  | 3.43512  |
| H | -2.08773 | 6.15422  | 1.37346  |
| H | -0.72863 | 5.11154  | 0.92153  |
| H | -2.33085 | 3.48056  | -0.13093 |
| H | -2.49700 | 5.09148  | -0.87422 |
| H | -3.69381 | 4.53125  | 0.31354  |

**3-RS – D**

|   |          |          |          |
|---|----------|----------|----------|
| P | -0.72642 | 2.75548  | 3.13995  |
| O | 0.54866  | 2.86109  | 3.90614  |
| O | -0.85779 | 1.53959  | 2.10043  |
| C | -2.19087 | 2.53764  | 4.17147  |
| C | 0.26212  | 1.16191  | 1.23669  |
| C | 0.30570  | -0.36792 | 1.14295  |
| C | 1.40995  | -0.75728 | 0.13301  |
| C | 1.23163  | -0.09076 | -1.23730 |
| C | 1.16447  | 1.43991  | -1.12251 |
| C | 0.06364  | 1.83040  | -0.12394 |
| C | 0.48740  | -1.12148 | 2.49315  |
| C | -0.82102 | -1.27947 | 3.28755  |
| C | 1.59612  | -0.53644 | 3.38549  |
| C | 0.94681  | 2.11107  | -2.48298 |
| C | -2.02210 | 2.31879  | 5.54544  |
| C | -3.14034 | 2.13801  | 6.36344  |
| C | -4.42388 | 2.17642  | 5.81172  |
| C | -4.59386 | 2.39903  | 4.44034  |
| C | -3.48036 | 2.58127  | 3.61972  |
| O | -1.03255 | 4.02954  | 2.17401  |
| C | -0.84744 | 5.36616  | 2.70745  |
| C | -1.00131 | 6.34546  | 1.55898  |
| H | 1.18601  | 1.52804  | 1.69998  |
| H | -0.65834 | -0.68316 | 0.71512  |
| H | 1.41778  | -1.84806 | 0.02147  |
| H | 2.39163  | -0.48086 | 0.54226  |
| H | 2.05026  | -0.38248 | -1.90762 |
| H | 0.30094  | -0.45137 | -1.70081 |
| H | 2.12805  | 1.78864  | -0.71799 |
| H | 0.02744  | 2.91608  | 0.01392  |
| H | -0.91592 | 1.52499  | -0.51782 |
| H | 0.80079  | -2.13757 | 2.20962  |
| H | -0.66760 | -1.95608 | 4.13655  |
| H | -1.17847 | -0.32450 | 3.67715  |
| H | -1.61649 | -1.70140 | 2.66206  |
| H | 1.77886  | -1.19984 | 4.23829  |
| H | 2.54399  | -0.43027 | 2.84605  |
| H | 1.32420  | 0.44645  | 3.78280  |
| H | 0.92371  | 3.20275  | -2.38933 |
| H | 1.74516  | 1.84855  | -3.18644 |
| H | -0.00626 | 1.79268  | -2.92371 |
| H | -1.01833 | 2.29431  | 5.95830  |
| H | -3.00914 | 1.96737  | 7.42790  |
| H | -5.29246 | 2.03476  | 6.44857  |
| H | -5.59198 | 2.43008  | 4.01324  |
| H | -3.60704 | 2.75411  | 2.55527  |
| H | -1.60326 | 5.54477  | 3.48361  |
| H | 0.14483  | 5.43026  | 3.16584  |
| H | -1.99144 | 6.25345  | 1.10227  |
| H | -0.87881 | 7.37104  | 1.92339  |
| H | -0.24596 | 6.15636  | 0.79028  |

**3-RS – E**

|   |          |          |          |
|---|----------|----------|----------|
| P | -0.55777 | 2.76166  | 3.42180  |
| O | 0.67541  | 2.44970  | 4.19003  |
| O | -0.84058 | 1.86093  | 2.10878  |
| C | -2.10634 | 2.57126  | 4.33450  |
| C | 0.27152  | 1.30227  | 1.34223  |
| C | -0.04695 | -0.16759 | 1.04551  |
| C | 1.08461  | -0.73760 | 0.16470  |
| C | 1.28325  | 0.08112  | -1.11983 |
| C | 1.56754  | 1.56262  | -0.82203 |
| C | 0.45621  | 2.13381  | 0.07491  |
| C | -0.35066 | -0.99042 | 2.32594  |
| C | 0.82339  | -1.06681 | 3.31687  |
| C | -0.86287 | -2.39823 | 1.98043  |
| C | 1.72796  | 2.38709  | -2.10384 |
| C | -3.31508 | 2.24631  | 3.69979  |
| C | -4.48867 | 2.13626  | 4.44874  |
| C | -4.46066 | 2.34925  | 5.83043  |
| C | -3.25636 | 2.66726  | 6.46604  |
| C | -2.08010 | 2.77756  | 5.72203  |
| O | -0.51798 | 4.29140  | 2.87453  |
| C | -1.54915 | 4.81424  | 2.00505  |
| C | -1.12241 | 6.20251  | 1.56553  |
| H | 1.17419  | 1.36765  | 1.95964  |
| H | -0.96915 | -0.16957 | 0.44230  |
| H | 0.86617  | -1.77936 | -0.09122 |
| H | 2.02383  | -0.74552 | 0.73364  |
| H | 2.10277  | -0.34292 | -1.71379 |
| H | 0.37682  | 0.01214  | -1.74022 |
| H | 2.51268  | 1.61534  | -0.25928 |
| H | 0.68246  | 3.17002  | 0.35340  |
| H | -0.49392 | 2.14367  | -0.47824 |
| H | -1.17032 | -0.46375 | 2.83042  |
| H | 1.68750  | -1.57900 | 2.87764  |
| H | 0.52499  | -1.63702 | 4.20377  |
| H | 1.14051  | -0.07789 | 3.66062  |
| H | -1.23280 | -2.90199 | 2.88020  |
| H | -1.68463 | -2.36148 | 1.25492  |
| H | -0.07011 | -3.02720 | 1.55921  |
| H | 0.80568  | 2.36355  | -2.69796 |
| H | 1.95464  | 3.43522  | -1.87763 |
| H | 2.53798  | 1.99394  | -2.72840 |
| H | -3.32979 | 2.06268  | 2.63040  |
| H | -5.42154 | 1.87906  | 3.95549  |
| H | -5.37415 | 2.26058  | 6.41150  |
| H | -3.23158 | 2.82221  | 7.54064  |
| H | -1.13750 | 3.00662  | 6.20988  |
| H | -1.66766 | 4.14344  | 1.14618  |
| H | -2.49848 | 4.84620  | 2.55442  |
| H | -1.88469 | 6.63791  | 0.91035  |
| H | -0.99056 | 6.85629  | 2.43248  |
| H | -0.17537 | 6.15778  | 1.01959  |

**3-RS – F**

|   |          |          |          |
|---|----------|----------|----------|
| P | -1.48813 | 2.93666  | 2.51395  |
| O | -0.46197 | 3.70932  | 1.75667  |
| O | -1.69413 | 1.40189  | 2.02804  |
| C | -1.21260 | 2.89528  | 4.29725  |
| C | -0.60889 | 0.51482  | 1.61572  |
| C | -0.01399 | 0.90415  | 0.25052  |
| C | 1.03247  | -0.16537 | -0.12865 |
| C | 2.12083  | -0.31074 | 0.94551  |
| C | 1.52836  | -0.64783 | 2.32346  |
| C | 0.46443  | 0.39742  | 2.69956  |
| C | -1.09139 | 1.16317  | -0.83405 |
| C | -1.97254 | -0.05557 | -1.15184 |
| C | -0.47135 | 1.73661  | -2.11821 |
| C | 2.60899  | -0.75104 | 3.40537  |
| C | -2.04248 | 2.14564  | 5.14399  |
| C | -1.78351 | 2.10632  | 6.51430  |
| C | -0.69559 | 2.81163  | 7.04185  |
| C | 0.13135  | 3.55939  | 6.19904  |
| C | -0.12583 | 3.60324  | 4.82635  |
| O | -3.01343 | 3.45847  | 2.42928  |
| C | -3.65183 | 3.59215  | 1.13199  |
| C | -4.94188 | 4.36460  | 1.33094  |
| H | -1.11908 | -0.45079 | 1.52514  |
| H | 0.51347  | 1.85550  | 0.39691  |
| H | 1.49436  | 0.09314  | -1.08693 |
| H | 0.53866  | -1.13678 | -0.27178 |
| H | 2.84185  | -1.08387 | 0.65071  |
| H | 2.68209  | 0.63209  | 1.02327  |
| H | 1.02795  | -1.62620 | 2.24303  |
| H | -0.00928 | 0.14110  | 3.65407  |
| H | 0.95421  | 1.37125  | 2.83222  |
| H | -1.74537 | 1.94118  | -0.42546 |
| H | -2.73927 | 0.21235  | -1.88770 |
| H | -2.48984 | -0.43110 | -0.26288 |
| H | -1.38681 | -0.87835 | -1.57773 |
| H | -1.25548 | 2.06760  | -2.80864 |
| H | 0.16782  | 2.59868  | -1.89692 |
| H | 0.13347  | 0.99125  | -2.64736 |
| H | 2.17600  | -1.01216 | 4.37769  |
| H | 3.35289  | -1.51407 | 3.14963  |
| H | 3.13454  | 0.20517  | 3.51916  |
| H | -2.88230 | 1.59617  | 4.72993  |
| H | -2.42645 | 1.52669  | 7.17033  |
| H | -0.49442 | 2.77757  | 8.10886  |
| H | 0.97477  | 4.10755  | 6.60855  |
| H | 0.50872  | 4.17613  | 4.15713  |
| H | -2.97179 | 4.11803  | 0.45244  |
| H | -3.84130 | 2.58815  | 0.73608  |
| H | -4.73522 | 5.36067  | 1.73305  |
| H | -5.46155 | 4.47446  | 0.37294  |
| H | -5.60211 | 3.83879  | 2.02732  |



#### 4. References

- 1 M. C. Tichotová, L. Tučková, H. Kocek, A. Růžička, M. Straka and E. Procházková, *Phys. Chem. Chem. Phys.*, 2024, **26**, 2016-2024.
- 2 M. Tichotová, A. Ešnerová, L. Tučková, L. Bednářová, I. Císařová, O. Baszczyński and E. Procházková, *J. Magn. Reson.*, 2022, **336**, 107149.
- 3 MacroModel v13.1, Schrödinger, LLC, New York, 2021.
- 4 Schrödinger Release 2022-1 ed., Schrödinger, LLC, New York, NY, 2022.
- 5 C. Lu, C. Wu, D. Ghoreishi, W. Chen, L. Wang, W. Damm, G. A. Ross, M. K. Dahlgren, E. Russell, C. D. Von Bargen, R. Abel, R. A. Friesner and E. D. Harder, *J. Chem. Theory Comput.*, 2021, **17**, 4291-4300.
- 6 Gaussian 16 Rev. C.01, Wallingford, CT, 2016.
- 7 C. Lee, W. Yang and R. G. Parr, *APS*, 1988, **37**, 785-789.
- 8 A. D. Becke, *J. Chem. Phys.*, 1993, **98**, 5648-5652.
- 9 S. H. Vosko, L. Wilk and M. Nusair, *Can. J. Phys.*, 1980, **58**, 1200-1211.
- 10 P. J. Stephens, F. J. Devlin, C. F. Chabalowski and M. J. Frisch, *J. Phys. Chem.*, 1994, **98**, 11623-11627.
- 11 S. Grimme, J. Antony, S. Ehrlich and H. Krieg, *J. Chem. Phys.*, 2010, **132**, 154104.
- 12 V. Barone and M. Cossi, *J. Phys. Chem. A*, 1998, **102**, 1995-2001.
- 13 D. Comaniciu and P. Meer, *IEEE Trans. Pattern Anal. Mach. Intell.*, 2002, **24**, 603-619.
- 14 A. Ibáñez de Opakua, F. Klama, I. E. Ndukwe, G. E. Martin, R. T. Williamson and M. Zweckstetter, *Angew. Chem. Int. Ed.*, 2020, **59**, 6172-6176.
- 15 M. Zweckstetter, *Nat. Protoc.*, 2008, **3**, 679-690.
- 16 A. Ibáñez de Opakua and M. Zweckstetter, *Magn. Reson.*, 2021, **2**, 105-116.
- 17 T. Raček, O. Schindler, D. Toušek, V. Horský, K. Berka, J. Koča and R. Svobodová, *Nucleic Acids Res.*, 2020, **48**, W591-W596.
- 18 W. J. Mortier, S. K. Ghosh and S. Shankar, *J. Am. Chem. Soc.*, 1986, **108**, 4315-4320.
- 19 S. Geidl, T. Bouchal, T. Raček, R. Svobodová Vařeková, V. Hejret, A. Křenek, R. Abagyan and J. Koča, *J. Cheminformatics*, 2015, **7**, 59.
- 20 J. G. P. Wicker and R. I. Cooper, *J. Chem. Inf. Model.*, 2016, **56**, 2347-2352.
- 21 U. Sternberg, F.-T. Koch, M. Bräuer, M. Kunert and E. Anders, 2001, **7**, 54-64.
- 22 M. Möllhoff and U. Sternberg, 2001, **7**, 90-102.
- 23 U. Sternberg, P. Tzvetkova and C. Muhle-Goll, *Phys. Chem. Chem. Phys.*, 2020, **22**, 17375-17384.
- 24 C. A. G. Haasnoot, F. A. A. M. De Leeuw, H. P. M. De Leeuw and C. Altona, 1981, **20**, 1211-1245.
- 25 G. Palermo, R. Riccio and G. Bifulco, 2010, **75**, 1982-1991.
- 26 U. Sternberg and C. Farès, *Phys. Chem. Chem. Phys.*, 2022, **24**.
